# Alphaproteobacteria fix nitrogen in a *Sphagnum*-dominated peat bog using molybdenum-dependent nitrogenase

Melissa J. Warren<sup>1\*</sup>, Xueju Lin<sup>2\*\*</sup>, John C. Gaby<sup>2\*\*\*</sup>, Cecilia B. Kretz<sup>1\*\*\*\*</sup>, Peter L. Morton<sup>3</sup>, Jennifer Pett-Ridge<sup>4</sup>, David J. Weston<sup>5</sup>, Christopher W. Schadt<sup>5</sup>, Joel E. Kostka<sup>1,2</sup>, Jennifer B. Glass<sup>1,2#</sup>

<sup>1</sup>School of Earth and Atmospheric Sciences, Georgia Institute of Technology, Atlanta, GA, USA

<sup>2</sup>School of Biology, Georgia Institute of Technology, Atlanta, GA, USA

<sup>3</sup>Department of Earth, Ocean and Atmospheric Science, Florida State University, Tallahassee, Florida, USA

<sup>4</sup>Physical and Life Sciences Directorate, Lawrence Livermore National Laboratory, Livermore, CA, USA

<sup>5</sup>Biosciences Division, Oak Ridge National Laboratory, Oak Ridge, TN, USA

Now at: \*CH2M, Atlanta, GA, USA; \*\*InstantLabs, Baltimore, MD, USA; \*\*\*Faculty of Chemistry, Biotechnology and Food Science, Norwegian University of Life Sciences, Oslo, Norway; \*\*\*\*Division of Bacterial Diseases, National Center for Immunization and Respiratory Diseases, Centers for Disease Control and Prevention, Atlanta, GA, USA

**#Corresponding author:** Jennifer B. Glass, 404-894-3942; [jennifer.glass@eas.gatech.edu](mailto:jennifer.glass@eas.gatech.edu)

**Running Title:** Molybdenum-based nitrogen fixation in a *Sphagnum* peat bog

## Abstract

Microbial N<sub>2</sub> fixation (diazotrophy) represents an important nitrogen source to oligotrophic peatland ecosystems, which are important sinks for atmospheric CO<sub>2</sub> and susceptible to changing climate. The objective of this study was to investigate the pathways and controls of diazotrophy, as well as the active microbial groups that mediate the process in *Sphagnum*-dominated peat bogs. In an ombrotrophic peat bog (S1) in the Marcell Experimental Forest (Minnesota, USA), low (μM) levels of inorganic nitrogen were observed, suggesting that diazotrophy could have a significant influence on ecosystem properties. Despite higher dissolved vanadium (V) (11 nM) than molybdenum (Mo) (3 nM) in surface peat, a combination of metagenomic, amplicon sequencing and activity measurements indicated that Mo-containing nitrogenases dominate over the V-containing form. Diazotrophy was only detected in surface peat exposed to light, with the highest rates observed in peat collected from hollows with the highest water content. Rates were suppressed by O<sub>2</sub>, and unaffected by CH<sub>4</sub> and CO<sub>2</sub> amendments. Acetylene fully inhibited CH<sub>4</sub> consumption under oxic conditions, but only partially inhibited <sup>15</sup>N<sub>2</sub> incorporation in degassed incubations, and had a minimal effect on oxic <sup>15</sup>N<sub>2</sub> incorporation. Through a close coupling of process rate measurements with molecular analysis of the metabolically active microbial communities, our findings suggest that diazotrophy in surface layers of the S1 bog is mediated by *Alphaproteobacteria* (*Bradyrhizobiaceae* and *Beijerinckiaceae*) supported by photosynthate, rather than methane, for carbon and/or energy.

## 41 **Importance**

42 Previous studies indicate that diazotrophy provides an important nitrogen source and is linked to  
 43 methanotrophy in *Sphagnum*-dominated peatlands. However, the environmental controls and  
 44 enzymatic pathways of diazotrophy, as well as the metabolically active microbial populations  
 45 that catalyze this process in peatlands, remain in question. Our findings indicate that oxygen  
 46 levels and photosynthetic activity override low nutrient availability in limiting diazotrophy, and  
 47 that primarily non-methanotrophic members of the *Alphaproteobacteria* (*Bradyrhizobiaceae* and  
 48 *Beijerinckiaceae*) catalyze this process primarily at the bog surface.

49

## Introduction

High-latitude peatlands store approximately one-third of global soil carbon and may pose a climatic threat if rising global temperatures accelerate the release of this stored carbon in gaseous forms as either carbon dioxide or methane (32, 59, 94). Mineral-poor (ombrotrophic) peatlands receive most of their nutrient inputs from atmospheric deposition and contain *Sphagnum* moss as their primary plant cover (11, 59). The peatmoss *Sphagnum* is a keystone genus in these ecosystems with its biological function and abiotic environment responsible for much of the primary production and recalcitrant dead organic matter (12, 92). *Sphagnum* mosses also host complex microbiomes (8, 53, 69, 70), including N<sub>2</sub>-fixers (diazotrophs) that are significant nitrogen sources to peatland ecosystems (4).

Despite decades of research, there is still much debate on the identity of the dominant diazotrophs in ombrotrophic peatlands. Early work implicated Cyanobacteria (1, 33, 34) or heterotrophic bacteria (78) based primarily on microscopic studies, while more recent molecular analyses argue for the importance of methanotrophic *Beijerinckiaceae* (18) as major diazotrophs in *Sphagnum* peat bogs (7, 21, 40, 89). Possible contributions from other potential diazotrophs, such as strictly anaerobic methanogenic *Euryarchaeota*, remain unknown. However, it is quite possible that diverse diazotrophs exist within defined niches of peatland environments (55).

Diazotrophy is catalyzed by the nitrogenase metalloenzyme, a complex of three subunits (H, D and K) that contains abundant iron as Fe-S clusters. This enzyme is extremely O<sub>2</sub> sensitive (93), and must be protected from exposure to O<sub>2</sub> for diazotrophy to occur (24). The most common form of nitrogenase, encoded by *nif* genes, contains molybdenum (Mo) as its cofactor. When Mo is scarce, some species of Bacteria and Archaea express nitrogenases containing vanadium (V; *vnf* genes) or iron (Fe; *anf* genes) in place of Mo, but these “alternative”

nitrogenases are less efficient than the Mo form (67, 90). Phylogenetic analyses of the most conserved nitrogenase gene, *nifH*, revealed four clusters: aerobic bacteria (cluster I); alternative nitrogenases (cluster II); anaerobic bacteria and archaea (cluster III); uncharacterized sequences (cluster IV), and paralogs related to chlorophyll biosynthesis (cluster V; 76). Consistent with higher concentrations of V than Mo in most rocks (91), microbes from diverse soils contain *vnf* (cluster II) genes (3, 6, 16, 41, 65). Given the oligotrophic conditions that predominate in peatlands, trace metals may limit diazotrophy. However, little is known about trace metal availability and the role of alternative nitrogenase pathways in ombrotrophic peatlands.

Similarly and importantly, methane monooxygenase (MMO) (the enzyme that catalyzes the first step of methane oxidation) occurs in particulate (copper (Cu)-containing pMMO) and soluble (Fe-containing sMMO) forms. While pMMO has more specific substrate requirements, pathways that employ sMMO can use a wider range of compounds (14). Both forms of MMO are inhibited by acetylene ( $C_2H_2$ ) (13, 73). In organisms with both sets of genes, pMMO is expressed when Cu is abundant, whereas Cu limitation induces sMMO expression (80). The dominant peatland methanotrophs in the *Alphaproteobacteria* and *Gammaproteobacteria* tend to possess both MMOs (10, 23, 35, 47, 63), although *Methylocella* species containing solely sMMO have been isolated from peat bogs (19, 20). While most studies have primarily targeted the *pmoA* gene (23, 47), *mmoX* genes and transcripts have also been reported in peatlands (58, 63, 75), raising questions about the relative importance of each form for peatland methane oxidation.

The acetylene reduction assay (ARA) is commonly used as a proxy for diazotroph activity (37, 38). This assay is effective for capturing the potential activity of diazotrophic bacteria that are not inhibited by  $C_2H_2$ , such as *Cyanobacteria* and non-methanotrophic *Proteobacteria* (e.g. *Bradyrhizobiaceae*) (45). However, a number of functional guilds of

microorganisms (including methanotrophs, methanogens, sulfate reducers, and nitrifiers) are inhibited by  $C_2H_2$  (15, 44, 71, 72, 82, 84). If these or other  $C_2H_2$ -sensitive microbes (see Fulweiler, et al. (25)) perform diazotrophy and/or provide substrates to other diazotrophs, ARA may underestimate  $N_2$  fixation activity in that system. Thus, recent studies have shifted to tracking  $N_2$  fixation by incorporation of the stable isotope tracer,  $^{15}N_2$  (50, 55, 56, 89).

In this study of the S1 peat bog at the Marcell Experimental Forest in Minnesota, USA, dissolved macro- ( $NH_4^+$ ,  $NO_3^-$ ,  $PO_4^{3-}$ ) and micro- (Fe, Cu, V, Mo) nutrients were profiled along with the community composition and abundance of diazotrophic microorganisms. We also performed separate laboratory incubation experiments to measure potential rates of ARA and  $^{15}N_2$  incorporation to: (a) assess environmental controls (light,  $O_2$ ,  $CH_4$ ) on diazotrophy; (b) quantify the effect of  $C_2H_2$  on rates of diazotrophy and methanotrophy; and (c) search for diagnostic markers for alternative nitrogenase activity such as a low conversion factor of ARA to  $^{15}N_2$ -incorporation (3) and  $C_2H_2$  reduction to ethane (22). Finally, we make recommendations on universal *nifH* primers for amplicon sequencing and quantitative PCR based on our findings.

## Materials and Methods

**Site description and sample collection.** Samples were collected from the S1 (black spruce-*Sphagnum* spp.) peat bog at Marcell Experimental Forest (MEF; 47°30.476' N; 93°27.162' W), the site of the DOE SPRUCE (Spruce and Peatland Responses Under Climatic and Environmental Change) experiment in northern Minnesota, USA (36). The S1 bog is ombrotrophic and acidic (average pH 3.5-4; 52, 79). Dissolved  $O_2$  levels decrease to below detection (~20 ppb) within the top 5 cm of the bog. Three locations were sampled along S1 bog transect 3 (T3) at near, middle and far sites (see Lin, et al. (64) for further details). Surface (0-10

cm depth) peat was collected from hollows dominated by a mixture of *Sphagnum fallax* and *S. angustifolium*, and hummocks dominated by *S. magellanicum*. Peat depth cores (0-200 cm) were sampled from hollows where the water level reached the surface of the *Sphagnum* layer.

**Macronutrients.** Peat porewater was collected using piezometers from 0, 10, 25, 50, 75, 150 and 200 cm depth. Piezometers were recharged the same day as collection, and porewater was pumped to the surface, filtered through sterile 0.2  $\mu\text{m}$  polyethersulfone membrane filters, and stored frozen until analysis. Nitrate ( $\text{NO}_3^-$ ) and nitrite ( $\text{NO}_2^-$ ) were analyzed using the spectrophotometric assay as described by García-Robledo, et al. (28). Ammonium ( $\text{NH}_4^+$ ) concentrations were determined with the indophenol blue assay (85). Phosphate concentrations were measured with the molybdate-antimony ascorbic acid colorimetric assay (68).

**Micronutrients.** Peat porewater was collected from two locations in the S1 bog from cores at 0-30 cm, 30-50 cm, and 100-150 cm depths by filtration through 0.15  $\mu\text{m}$  Rhizon soil samplers (Rhizosphere Research Products). All plastics were HCl washed prior to sampling; Rhizon soil samplers were cleaned by pumping 10 mL of 1 N HCl through them, followed by a rinsing with ultrapure water until the pH returned to neutral ( $\sim 100$  mL/filter). After collection, samples were acidified to 0.32 M  $\text{HNO}_3$  (Fisher Optima) and analyzed using a Thermo ELEMENT 2 HR-ICP-MS (National High Magnetic Field Laboratory, Florida State University). Initial analyses resulted in frequent clogging of the nebulizer, likely due to abundant dissolved organic carbon. Therefore, samples were diluted 1:10 to minimize interruptions from nebulizer clogs. Concentrations were quantified with a 7-point external calibration using standards prepared in 0.32 N  $\text{HNO}_3$  from a multi-element standard mix (High Purity Standards). In order to measure lower concentrations but avoiding sample dilution, subsequent samples were digested before ICP-MS analysis. Briefly, 1 mL porewater samples were digested for 36 hours at 250°C

in a trace metal clean polypropylene exhausted laminar flow hood with 1 mL of 16 N  $\text{NH}_4\text{OH}$  (Ultrex II, JT Baker) and 100  $\mu\text{L}$  of 30%  $\text{H}_2\text{O}_2$  (Ultrex II, JT Baker) in acid-washed Teflon vials. Samples were then evaporated to near dryness, resuspended in 0.32 N  $\text{HNO}_3$ , and analyzed by ELEMENT2 ICP-MS along with parallel blank solutions.

**Quantification and sequencing of gene and transcript amplicons.** Peat was frozen on dry ice at the field site in July 2013, or in liquid  $\text{N}_2$  after 7 days at 25°C in the light under degassed (80%  $\text{N}_2$  + 20%  $\text{CO}_2$ ) headspace with 1%  $\text{C}_2\text{H}_2$ , with or without 1%  $\text{CH}_4$  for June 2014 incubations (see ARA section for more details). DNA and RNA extractions were performed with MoBio PowerSoil DNA and total RNA extraction kits, respectively, as described in Lin, et al. (63). cDNA was prepared by reverse transcription as in Esson, et al. (23). Primer pairs were polF/polR for *nifH* (25), A189f/Mb661r for *pmoA* (51), mmoX-206f/mmoX-886r for *mmoX* (43), Mlas/mcrA-rev for *mcrA* (83), nifD820F/nifD1389R followed by nifD820F/nifD1331R for *nifD* (3), and vnfD\_anfD548F/vnfD\_anfD1337R followed by vnfD\_anfD548F/vnfD\_anfD1291R for *vnfD/anfD* (3). PCR conditions were based on (27), (23), (58), (83), (3) and (9) for *nifH*, *pmoA*, *mmoX*, *mcrA*, *nifD/vnfD/anfD* and 16S rRNA, respectively.

Gene fragments for qPCR were amplified from genomic DNA and plasmid standards were constructed according to Lin, et al. (61). To prepare cDNA standards, plasmid DNA with a positive gene insert was linearized with NcoI restriction enzyme following the manufacturer's protocol (Promega), and purified by MinElute PCR purification kit (Qiagen). RNA was synthesized from the linearized plasmid DNA using the Riboprobe in vitro transcription system according to the manufacturer's protocol (Promega). Then, cDNA standards and cDNA of environmental RNA samples were synthesized using the GoScript Reverse Transcription system following the manufacturer's protocol (Promega). Samples were run in duplicate against a



plasmid DNA standard curve on a StepOnePlus Real-Time PCR System (ABI) using Power SYBR Green PCR master mix. Functional gene and transcript copy numbers were normalized to dry weight of peat as well as 16S rRNA transcript copies for incubation samples. Amplicons were sent to the University of Illinois at Chicago for DNA sequencing using a 454 platform. Raw sequences were demultiplexed, trimmed, and quality filtered in CLCbio. The phylogeny of *vnfD/anfD* sequences was inferred using the Maximum Likelihood method based on the Kimura 2-parameter model in MEGA5 (86).

***Acetylene reduction and methane consumption rates.*** Samples of bulk peat (*Sphagnum* spp. and surrounding soil) was collected from 0-10 and 10-30 cm depths in September 2013, April 2014, June 2014, September 2014 and August 2015, and stored at 4°C until the start of laboratory incubations. Samples from 0-10 cm depth were gently homogenized so as not to rupture *Sphagnum* spp. tissues, while peat samples from 10-30 cm depth were fully homogenized. For each sample, 5 g of bulk peat were placed in 70 mL glass serum bottles, stoppered with black butyl stoppers (Geo-Microbial Technologies) and sealed with an aluminum crimp seal. Headspace were oxic (room air, 80% N<sub>2</sub> + 20% O<sub>2</sub>) or degassed (100% N<sub>2</sub> or 80% N<sub>2</sub> + 20% CO<sub>2</sub>) with or without 1% C<sub>2</sub>H<sub>2</sub> or 1% CH<sub>4</sub>. Treatments were incubated for one week at 25°C in the light or dark. A gas chromatograph with a flame ionization detector (SRI Instruments, Torrance, CA, USA) equipped with a HayeSep N column was used to quantify CH<sub>4</sub>, C<sub>2</sub>H<sub>2</sub> and C<sub>2</sub>H<sub>4</sub>. Samples were measured for C<sub>2</sub>H<sub>4</sub> production daily until C<sub>2</sub>H<sub>4</sub> production was linear (~7 days). Controls not amended with C<sub>2</sub>H<sub>2</sub> did not produce ethylene (C<sub>2</sub>H<sub>4</sub>). Incubations of hollow peat from June 2014 incubated in oxic headspace with and without 1% C<sub>2</sub>H<sub>2</sub> were also monitored for consumption of 1% CH<sub>4</sub>. Statistical analysis was performed with JMP Pro (v. 12.1.0) using the Student's T-test.

**$^{15}\text{N}_2$  incorporation rates.** In September 2014, samples were quantified for  $\text{N}_2$  fixation rates by  $^{15}\text{N}_2$  incorporation in parallel with ARA measurements. Incubations were set up as described above and supplemented with 7 mL of 98%  $^{15}\text{N}_2$  (Cambridge Isotope Laboratories, Tewksbury, MA, USA). After 7 days, samples were dried at  $80^\circ\text{C}$ , homogenized into a fine powder, and analyzed for N content and  $\delta^{15}\text{N}$  by isotope-ratio mass spectrometry (IRMS) with a MICRO cube elemental analyzer and IsoPrime100 IRMS (Elementar) at the University of California, Berkeley, corrected relative to National Institute of Standards and Technology (NIST, Gaithersburg, MD, USA) standards.

**Metagenomic analyses.** Metagenomes were generated in a previous study (62). Diazotrophic and methanotrophic pathways were interrogated using the following bioinformatics approaches. Briefly, Illumina reads were filtered by quality (Phred33 score threshold of Q25) using Trim Galore (Babraham Bioinformatics) and a minimum sequence length cut off of 100 bp. The sequences were then queried using RAPSearch2 (95) against the NCBI-nr database of non-redundant protein sequences as of November 2013. Sequences with a bit-score of 50 and higher were retained to determine the total number of functional genes for normalization across the different samples. The taxonomic composition of protein-coding sequences was determined based on the taxonomic annotation of each gene according to the NCBI-nr taxonomy in MEGAN5 (42) (min score: 50; max expected: 0.01; top percent: 10; min complexity: 0.3).

To classify sequences by nitrogenase cluster type, genes were analyzed using BLASTX (e-value 0.1; bit-score 50) versus a custom *nifH* database that includes a phylogenetic tree to distinguish the principal clusters (I, V, III) in the *nifH* phylogeny, as well as paralogous cluster IV, *nifH*-like sequences (26). *nifH* genes from the four clusters were normalized to total protein-coding genes from RAPSearch2 output sequences. The relative abundance of particulate vs.

soluble methane monooxygenase (*pmoA* vs. *mmoX*, respectively) was based on previous analyses in Lin, et al. (63).

**Nucleotide sequence accession numbers.** Metagenomes were reported in a previous study (62) and deposited in BioProject XXXXXXXX. *pmoA* cDNA amplicons were reported in a previous study (23) and deposited in BioProject PRJNA311735. *nifH*, *mcrA*, *nifD*, and *vnfD/anfD* cDNA amplicons were deposited in BioProject XXXXXXXX.

## Results

**Macro/micro-nutrients and functional genes.** In S1 bog hollows,  $\text{NH}_4^+$  remained at 2  $\mu\text{M}$  from the surface to 25 cm depth, and increased at greater depths (Fig. 1; Fig. S1a). Nitrate was  $<1 \mu\text{M}$  in surface peat and decreased with depth (Fig. S1b). Phosphate was  $<0.1 \mu\text{M}$  from the surface to 25 cm depth, and then increased with depth (Fig. S1c). With the polF/polR primer pair, we measured  $1.2 \times 10^7$  copies  $\text{g}^{-1}$  *nifH* genes at 1 and 20 cm, and  $0.2 \times 10^7$  copies  $\text{g}^{-1}$  at 30 and 75 cm; *nifH* transcripts ( $12.2 \times 10^7$  copies  $\text{g}^{-1}$ ) were only detected at 1 cm (a 10:1 transcript: gene ratio), and not at deeper depths (Fig. 1; Fig. S2a). Sequencing of cDNA from surface peat amplified with polF/polR (*nifH*) and nifD820F/nifD1331R (*nifD*) primers showed that the vast majority of nitrogenase transcripts belonged to cluster I (*Alphaproteobacteria*), with *Bradyrhizobiaceae* dominating *nifH* sequences and *Beijerinckiaceae* dominating *nifD* sequences (Fig. S2). *nifH* transcripts from *Gammaproteobacteria*, *Cyanobacteria* (*Oscillatoriothyracaceae*) and *Nitrospira* were also observed at lower abundance in cDNA amplicon libraries (data not shown). Like *nifH*, *pmoA* and *mcrA* transcripts showed the highest abundance in surface peat (Fig. S2b,c). Surface *pmoA* transcripts mapped to *Methylocystaceae* (75%) and *Methylococcaceae* (25%). Surface

*mcrA* transcripts mapped to *Methanosarcina* (58%), *Methanocella* (28%), and *Methanoregula* (11%). Attempts to amplify *mmoX* from cDNA were unsuccessful (data not shown).

Vanadium (5-21 nM) was consistently more abundant than Mo (1-7 nM) at 0-30, 30-50 and 100-150 cm depth intervals (Fig. 2). In metagenomes, *nifH* genes were roughly equally distributed between Mo-dependent clusters I and III, and cluster IV/V paralogs (Fig. 2; Table S1). Sequences from Cluster II (alternative nitrogenases, *vnfH/anfH*) were scarce at all depths (<5% overall); two *vnfD* genes from metagenomes showed phylogenetic similarity to those from soil *Proteobacteria* (Fig. S3). Attempts to amplify *vnfD/anfD* from cDNA yielded few reads; those recovered were most similar to *Alphaproteobacteria* *anfD* from *Rhodopseudomonas* species (Fig. S4). Iron (7-35  $\mu$ M) was three orders of magnitude higher than Cu (7-38 nM; Fig. 3). Trace nutrients Co (5-20 nM), Ni (10-80 nM), Zn (50-250 nM) and Mn (60-2220 nM) were also quantified (data not shown). In metagenomes, genes for *pmoA* were dominant in surface peat, whereas *mmoX* sequences became more abundant with depth (Fig. 3). In hollow surface waters, other dissolved metals analyzed included Mn (~500 nM), Ni (~30 nM) and Co (~10 nM).

**Rates of diazotrophy and methanotrophy.** Potential rates of acetylene reduction were measured for peat collected from S1 bog hollows and hummocks in April, June, August and September 2013-2015 and incubated for 1 week at 25°C. Acetylene reduction to ethylene was only detected in surface (0-10 cm) peat samples incubated in the light, and not in deep (10-30 cm) peat, nor in surface peat incubated in the dark; acetylene reduction to ethane was not detected in any incubation (data not shown). *Sphagnum* in peat incubations exposed to light became visibly greener over the course of the incubation (Fig. 4). In hollows, where surface peat was dominantly covered by a mix of *S. fallax* and *S. angustifolium*, ARA rates were higher and more variable in degassed in comparison to oxic incubations (0-163 vs. 2-23  $\mu$ mol C<sub>2</sub>H<sub>4</sub> g<sup>-1</sup> h<sup>-1</sup>),

and were unaffected by the presence or absence of 20% CO<sub>2</sub>. *nifH* transcripts were also higher and more variable in hollows than hummocks (Fig. S5). ARA in hollows incubated with degassed headspace was positively correlated ( $P < 0.0001$ ) with peat water content (93 to 96%). In hummocks with lower water content (90-91%), surface peat was dominantly covered by *S. magellanicum*, and oxic and degassed treatments had similarly low ARA rates (0-8  $\mu\text{mol C}_2\text{H}_4 \text{ g}^{-1} \text{ h}^{-1}$ ). In both hollows and hummocks, ARA rates were not affected by addition of 1% CH<sub>4</sub>.

<sup>15</sup>N<sub>2</sub> incorporation showed similar overall trends as ARA (e.g. >90% higher rates in degassed vs. oxic conditions, and no significant CH<sub>4</sub> effect; Fig. 5). Using the four sites measured with both methods, a conversion factor of 3.9 for <sup>15</sup>N<sub>2</sub>-to-ARA was calculated (Fig. S6). In degassed treatments, 1% C<sub>2</sub>H<sub>2</sub> inhibited <sup>15</sup>N<sub>2</sub> incorporation by 55% but had no effect on oxic treatments. In oxic treatments, CH<sub>4</sub> consumption rates were 100 times higher than <sup>15</sup>N<sub>2</sub> incorporation rates, and 1% C<sub>2</sub>H<sub>2</sub> addition suppressed CH<sub>4</sub> oxidation rates by 95% (Fig. 5). *nifH* transcripts in surface peat from hollows incubated under degassed headspace with 1% C<sub>2</sub>H<sub>2</sub>, with or without 1% CH<sub>4</sub>, ranged from 10<sup>4</sup> - 10<sup>7</sup> copies g<sup>-1</sup> (July 2014; data not shown), which was 1-4 orders of magnitude lower than field samples from the previous summer (10<sup>8</sup> copies g<sup>-1</sup>; Fig. 1).

## Discussion

***Peat bog nutrient concentrations and metalloenzymes.*** By definition, the only source of nutrients to ombrotrophic peat bogs is the atmosphere, and thus these ecosystems are well known to be oligotrophic (60). Scarce macronutrients in S1 peat pore water and low rates of atmospheric deposition in Minnesota peat bogs (39) are consistent with oligotrophic conditions (60, 79, 87). Micronutrient concentrations (~15  $\mu\text{M}$  Fe, ~1  $\mu\text{M}$  Zn and nM-level Ni, Cu, V, Mo and Co) reported for acidic peatlands in Northern Europe (48) were similar to those we measured in the S1 bog. Molybdenum sorption to peat is enhanced at low pH (5), and Mo concentrations (<10

nM) here were within the same range as in other freshwaters worldwide (30). In laboratory cultures, <10 nM Mo can either limit growth (31) or induce expression of alternative nitrogenase (2). Although S1 peat bog waters contained higher V (11 nM) than Mo (3 nM), the majority of nitrogenase H-subunit genes retrieved from metagenomes belonged to Mo-containing clusters I and III. A significant number of sequences was also obtained from uncharacterized Cluster IV, recently shown to contain a functional nitrogenase (96) that likely binds a Mo-Fe cofactor (66). Cluster I (*Alphaproteobacteria*; *Rhizobiales*) showed the highest relative abundance in transcript libraries, with *Bradyrhizobiaceae* and *Beijerinckiaceae* dominating *nifD* and *nifH* amplicons, respectively, as seen in prior studies (58, 89). Overall, evidence for alternative nitrogenases was scant: (a) very few cluster II *vnfD/anfD* genes were found in metagenomes; (b) minimal *vnfD/anfD* amplification was obtained from peat cDNA; (c) ethane was undetectable in ARA incubations; and (d) the <sup>15</sup>N<sub>2</sub>-to-ARA conversion factor (3.9) – within the same range (3-4) as other peat bogs (37, 57, 89) – matched Mo-nitrogenase in pure culture experiments (3), as opposed to the lower values measured for alternative nitrogenases. Thus, in spite of lower abundance of Mo than V in S1 bog porewaters, our collective evidence strongly suggests N<sub>2</sub> fixation by the Mo-containing form of the nitrogenase enzyme.

Like diazotrophy, methanotrophy was apparently also mediated by the enzyme requiring the scarcer metal; dissolved Fe was consistently orders of magnitude higher than Cu in peat porewater, yet *pmoA* sequences were more abundant than *mmoX* sequences in surface peat in which the highest CH<sub>4</sub> consumption was observed (23, 63). Overall, these findings suggest that trace metal availability is not the overriding environmental pressure driving selection for diazotrophs and methanotrophs in *Sphagnum*-dominated peat bogs. Rather, water potential and oxygen appear to be more important. Low metal and phosphate concentrations add further

evidence to previous suggestions that these nutrients may limit *Sphagnum* productivity (55) and/or complex mechanisms may exist for nutrient scavenging at ultra-low concentrations. Additionally, the inherent nature of the peat matrix, with characteristically high levels of particulate and dissolved organic matter, likely also affects metal bioavailability in complex ways not addressed in our study (88).

***Environmental controls on diazotrophy.*** Methanotrophs have the potential to serve as a biofilter to suppress methane emissions, along with providing a nitrogen source for the dominant primary producers in peatland ecosystems. Previous field and laboratory studies point to a close coupling of diazotrophy and methanotrophy in *Sphagnum*-dominated peatlands (49, 55, 74, 89). This work has led others to suggest that methanotrophs provide the unaccounted nitrogen input resulting from an imbalance in atmospheric nitrogen deposition and accumulation in *Sphagnum* mosses (40). However, while substantial evidence indicates that methanotrophs are a source of nitrogen to peat mosses, the ecological relevance of diazotrophic methanotrophs and their importance to nitrogen flow still remains unclear because the two Alphaproteobacteria families that appear to be the dominant diazotrophs in *Sphagnum* peat bogs grow on complex organics (*Bradyrhizobiaceae* (29)) as well as simple alkanes and C1 compounds (*Beijerinckiaceae* (17)).

Our results from laboratory incubations of native peats revealed that diazotrophy was stimulated by light, suppressed by O<sub>2</sub>, and minimally affected by CH<sub>4</sub> and CO<sub>2</sub>. Consistent with previous reports (77), ARA and *nifH* transcription were only detected in surface samples incubated in the light, although it is possible that our methods excluded C<sub>2</sub>H<sub>2</sub>-sensitive diazotrophs at deeper depths (50). *nifH* transcripts were 1-4 orders of magnitude lower in laboratory incubations than in the field, suggesting either that the diazotrophs in our incubations



were stressed (e.g. nutrient-limited), and/or that a different assemblage of diazotrophs grew in the incubations than in the field due to primer specificity (see next section).

Complete CH<sub>4</sub> consumption in air with 1% CH<sub>4</sub> showed that methanotrophs were active in our peat incubations. If these aerobic methanotrophs were the dominant diazotrophs, as previously proposed (55, 89), the presence of O<sub>2</sub> and CH<sub>4</sub> should have stimulated <sup>15</sup>N<sub>2</sub> incorporation. Instead, our study and previous work (56) found the highest rates of diazotrophy at low O<sub>2</sub> and independent of CH<sub>4</sub> content. Acetylene fully inhibited CH<sub>4</sub> consumption under oxic conditions, but only partially inhibited <sup>15</sup>N<sub>2</sub> incorporation under degassed conditions (as in Kox, et al. (54)) and had a minimal effect on oxic <sup>15</sup>N<sub>2</sub> incorporation. Assuming that these incubations reflect field conditions, our data imply: (a) peatland diazotrophy is mediated by O<sub>2</sub>-sensitive microorganisms that rely on photosynthesis for carbon and/or energy sources; and (b) at least part of the diazotrophic community is C<sub>2</sub>H<sub>2</sub> sensitive. When we consider this in concert with the molecular information from the native peats, our data indicate that heterotrophic *Bradyrhizobiaceae* (C<sub>2</sub>H<sub>2</sub> insensitive, O<sub>2</sub> sensitive (46)) and *Beijerinckiaceae* (C<sub>2</sub>H<sub>2</sub> insensitive, O<sub>2</sub> insensitive (81)) were the primary diazotrophs in our incubations. Lesser contributions likely came from methanotrophic *Beijerinckiaceae* (C<sub>2</sub>H<sub>2</sub> sensitive, O<sub>2</sub> insensitive), photosynthetic cyanobacteria from the *Oscillatoriothycideae* (C<sub>2</sub>H<sub>2</sub> insensitive, O<sub>2</sub> sensitive (24)), and C<sub>2</sub>H<sub>2</sub>-sensitive, O<sub>2</sub>-sensitive members of anaerobic cluster III. Future studies are warranted to interrogate contrasts in the activity and gene expression of diazotrophs when comparing laboratory microcosm experiments to the field, since microcosm experiments are most often used as a proxy for *in situ* activity.

***Molecular markers for diazotrophy.*** We end with a word of caution with regard to the molecular detection of diazotrophs. The majority of studies in peatlands have employed PCR



348 amplification and sequencing of nitrogenase genes (*nifH*) for studying the dynamics of  
 349 diazotrophs in peatlands. A wide range of *nifH* primer sets exist, with varying universality (27).  
 350 Peat bog sequencing efforts have used polF/polR (this study; 58), F1/R6 (89),  
 351 FGPH19/polR+polF/AQER (56), and 19F/*nifH*3+*nifH*1(1)/*nifH*2(2) with nested PCR (7, 54).  
 352 We discourage use of polF/polR for peatland samples because *in silico* evaluation predicts that  
 353 this primer set will not amplify the majority of *Proteobacteria* and/or *Cyanobacteria* and Group  
 354 III *nifH* sequences (27). Of the *nifH* primer sets used previously, F1/R6, 19F/*nifH*3 and  
 355 *nifH*1(1)/*nifH*2 are predicted to have the highest coverage for soils (>80% predicted primer  
 356 binding for sequences from soil ecosystems). However, it is important to be aware that the F1/R6  
 357 primer set contains a number of mismatches with cluster III, including methanogens represented  
 358 in peatlands (Table S2). In order to maximize sequence coverage, we suggest the primer set  
 359 IGK(3)/DVV for future studies (27).

360    **Acknowledgments**

361    This research was funded by DOE support to J.E.K. under grant numbers DE-SC0007144 and  
362    DE-SC0012088. We thank Loren Dean Williams for inspiration with visuals, and Heather Dang  
363    (UC Berkeley) for IRMS analysis. Work at LLNL was conducted under the auspices of DOE  
364    Contract DE-AC52-07NA27344, with funding provided by LDRD 14-ER-038.

365

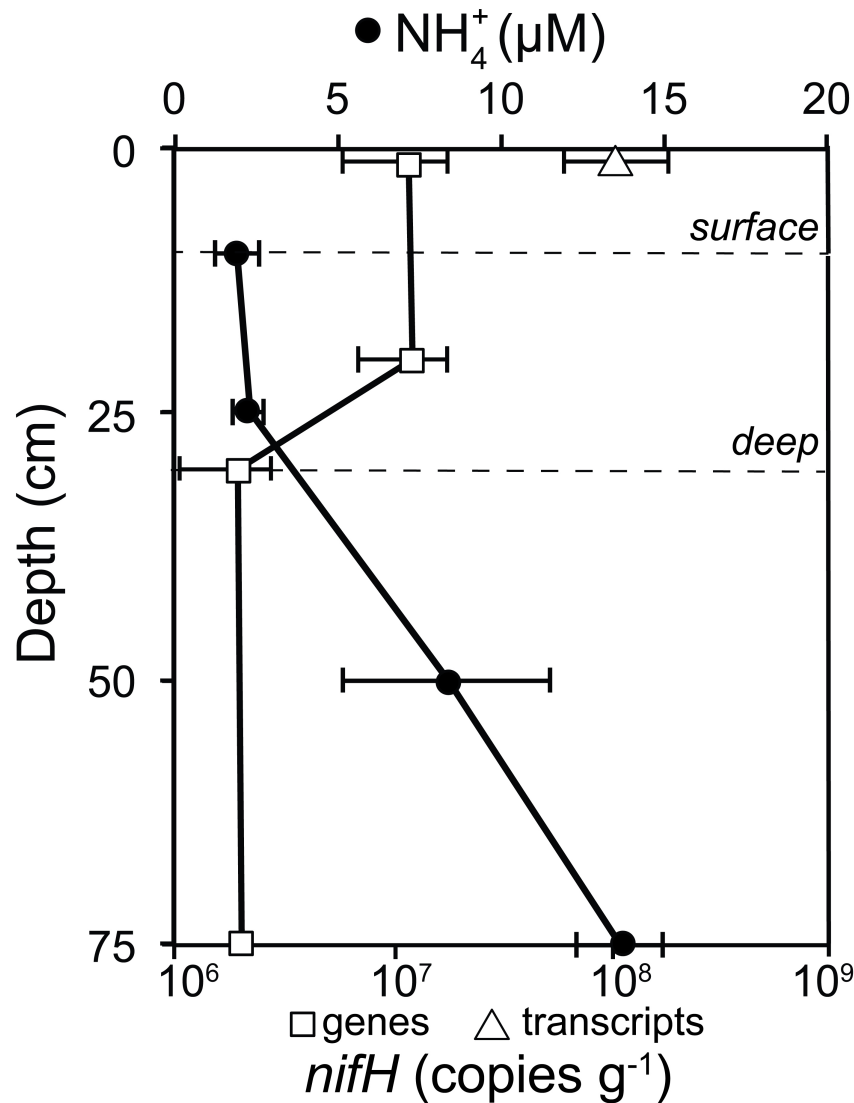

**Figure 1. Depth profiles of  $\text{NH}_4^+$  concentrations (black circles) and *nifH* gene copies (white squares) and transcripts (white triangle) in units of copies per gram of dry weight for the S1 bog T3 mid site. Concentrations are means of measurements from May, June and September 2014. *nifH* copy numbers are for July 2013. Error bars are standard errors. *nifH* transcripts were not detected at 20, 30 and 75 cm depths. Surface (0-10 cm) and deep (10-30 cm) peat depth intervals used for rate measurements are designated by dashed lines.**

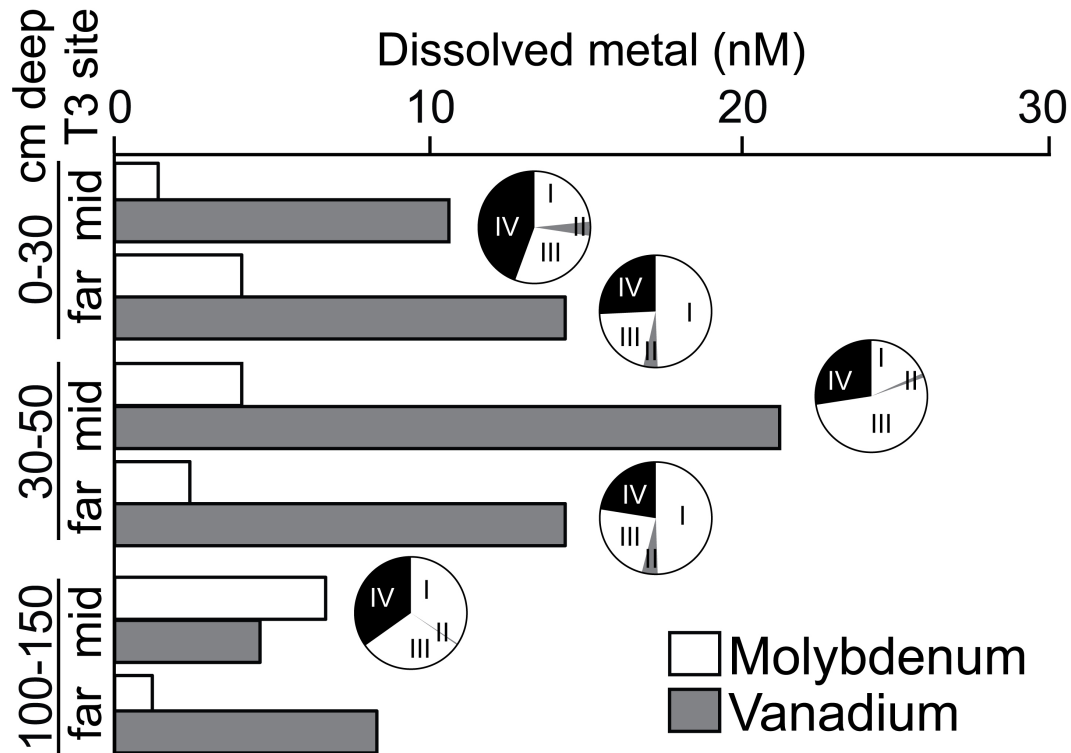

**Figure 2. Dissolved molybdenum (white) and vanadium (gray) concentrations in pore water from three depths in S1 peat hollows (mid and far sites along T3 transect). Pie charts show the relative abundance of genes encoding the five nitrogenase H-subunit clusters from metagenomes for each depth; clusters I and III encode Mo-Fe nitrogenases (*nifH*); cluster II encodes alternative (*vnfH*, *anfH*) nitrogenases; cluster IV encode nitrogenase paralogs. Deepest metagenomes were from 75 cm; insufficient numbers of nitrogenase H-subunit sequences were recovered from the far site for cluster analysis.**

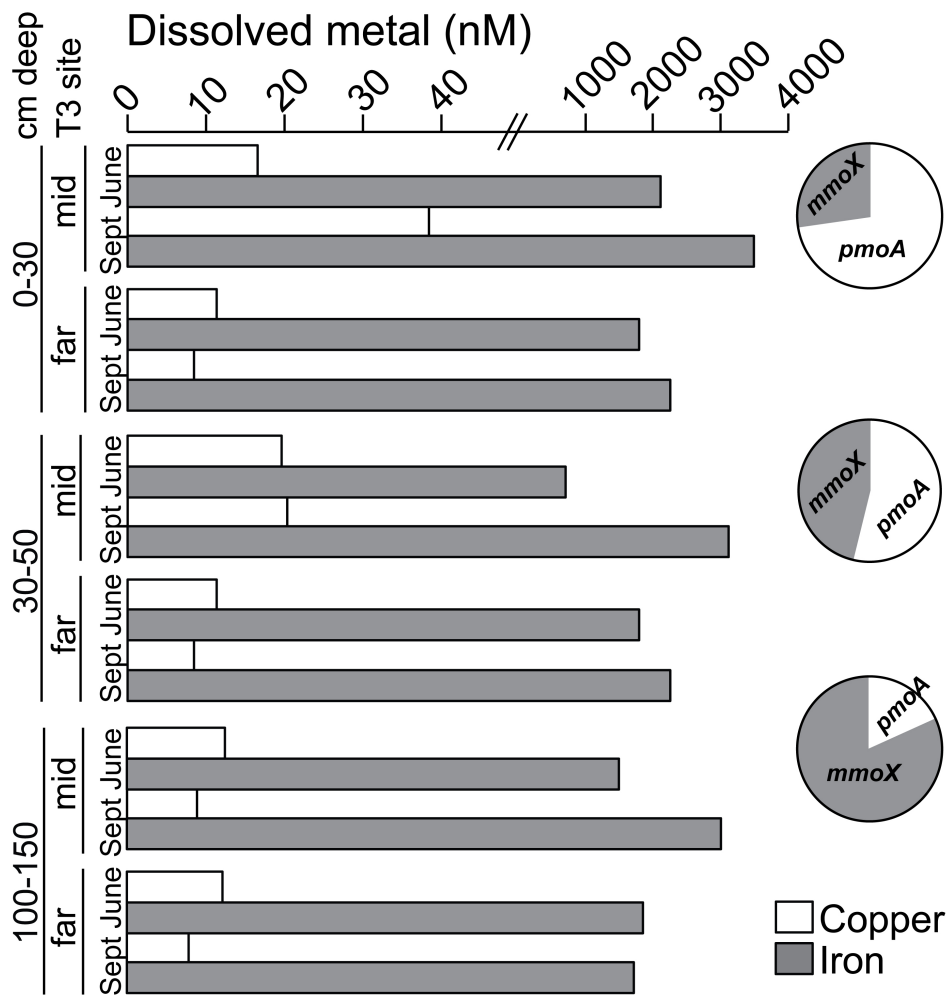

**Figure 3. Dissolved copper (white) and iron (shaded) concentrations in pore water from three depths in S1 peat hollows (mid and far sites along T3 transect). Pie charts show the relative abundance of *pmoA* (Cu-containing particulate methane monooxygenase) and *mmoX* (Fe-containing soluble methane monooxygenase) sequences recovered from metagenomes from T3 mid sites (0-10, 25-50, and 75-100 cm).**

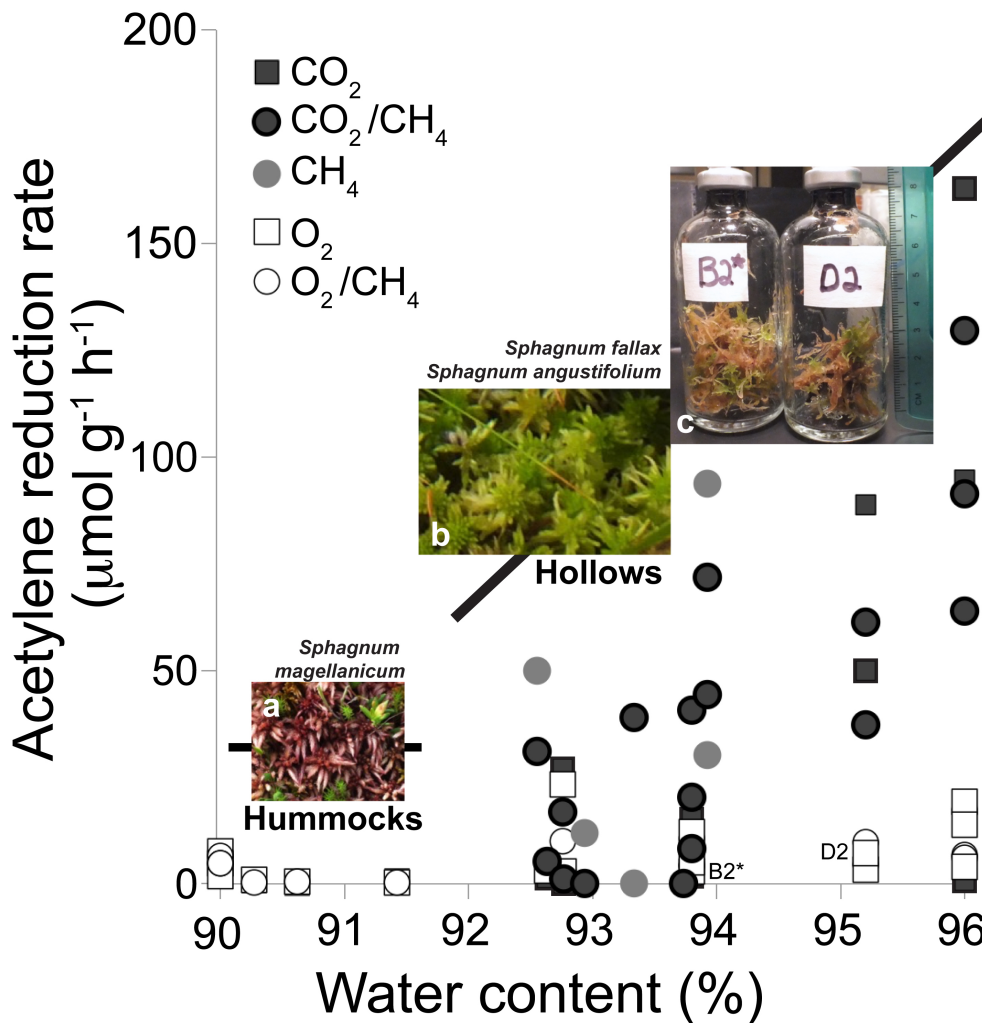

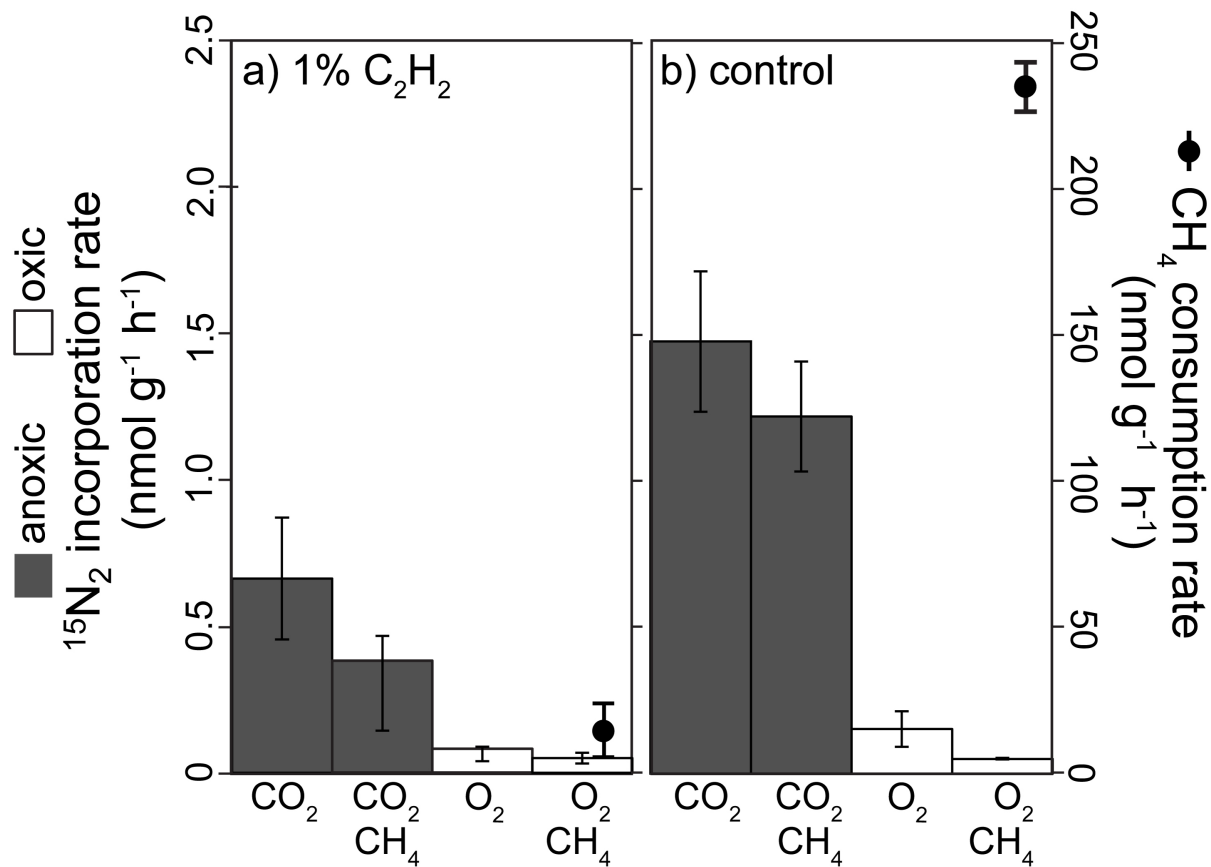

**Figure 5. Effect of 1% C<sub>2</sub>H<sub>2</sub> on <sup>15</sup>N<sub>2</sub> incorporation and CH<sub>4</sub> consumption for S1 bog surface peat.** Rates were measured for samples collected from the NW S1 bog transect in September 2014. <sup>15</sup>N<sub>2</sub> incorporation treatment conditions were 80%N<sub>2</sub>+20% CO<sub>2</sub>±1% CH<sub>4</sub> (shaded bars) or 80%N<sub>2</sub>+20% O<sub>2</sub>±1% CH<sub>4</sub> (white bars), with (a) and without (b) 1% C<sub>2</sub>H<sub>2</sub>; units are nmol <sup>15</sup>N<sub>2</sub> incorporated per gram of dry weight per hour. CH<sub>4</sub> consumption treatments were 80%N<sub>2</sub>+20% CO<sub>2</sub>+1% CH<sub>4</sub> (black circles) with (a) and without (b) 1% C<sub>2</sub>H<sub>2</sub>; units are nmol CH<sub>4</sub> consumed per gram of dry weight per hour. Error bars are standard errors.

## References

1. **Basilier, K., U. Granhall, T.-A. Stenström.** 1978. Nitrogen fixation in wet minerotrophic moss communities of a subarctic mire. *Oikos*:236-246.
2. **Bellenger, J. P., T. Wichard, Y. Xu, A. M. L. Kraepiel.** 2011. Essential metals for nitrogen fixation in a free living N<sub>2</sub> fixing bacterium: chelation, homeostasis and high use efficiency. *Environ. Microbiol.* **13**:1395–1411.
3. **Bellenger, J. P., Y. Xu, X. Zhang, F. M. M. Morel, K. A. M. L.** 2014. Possible contribution of alternative nitrogenases to nitrogen fixation by asymbiotic N<sub>2</sub>-fixing bacteria in soils. *Soil Biol Biochem* **69**:413-420.
4. **Berg, A., Å. Danielsson, B. H. Svensson.** 2013. Transfer of fixed-N from N<sub>2</sub>-fixing cyanobacteria associated with the moss *Sphagnum riparium* results in enhanced growth of the moss. *Plant Soil* **362**:271-278.
5. **Bertine, K.** 1972. The deposition of molybdenum in anoxic waters. *Marine Chemistry* **1**:43-53.
6. **Betancourt, D. A., T. M. Loveless, J. W. Brown, P. E. Bishop.** 2008. Characterization of diazotrophs containing Mo-independent nitrogenases, isolated from diverse natural environments. *Appl Environ Microbiol* **74**:3471-3480.
7. **Bragina, A., S. Maier, C. Berg, H. Müller, V. Chobot, F. Hadacek, G. Berg.** 2011. Similar diversity of alphaproteobacteria and nitrogenase gene amplicons on two related *Sphagnum* mosses. *Front Microbiol* **2**:275. doi: 210.3389/fmicb.2011.00275.
8. **Bragina, A., L. Oberauner - Wappis, C. Zachow, B. Halwachs, G. G. Thallinger, H. Müller, G. Berg.** 2014. The *Sphagnum* microbiome supports bog ecosystem functioning under extreme conditions. *Mol Ecol* **23**:4498-4510.
9. **Caporaso, J. G., C. L. Lauber, W. A. Walters, D. Berg-Lyons, J. Huntley, N. Fierer, S. M. Owens, J. Betley, L. Fraser, M. Bauer.** 2012. Ultra-high-throughput microbial community analysis on the Illumina HiSeq and MiSeq platforms. *ISME J* **6**:1621-1624.
10. **Chen, Y., M. G. Dumont, J. D. Neufeld, L. Bodrossy, N. Stralis-Pavese, N. P. McNamara, N. Ostle, M. J. Briones, J. C. Murrell.** 2008. Revealing the uncultivated majority: combining DNA stable isotope probing, multiple displacement amplification and metagenomic analyses of uncultivated *Methylocystis* in acidic peatlands. *Environ Microbiol* **10**:2609-2622.
11. **Clymo, R.** 1984. The limits to peat bog growth. *Philos T Roy Soc B* **303**:605-654.
12. **Clymo, R., P. Hayward.** 1982. The ecology of *Sphagnum*, p. 229-289, Bryophyte Ecology. Springer.
13. **Colby, J., H. Dalton.** 1976. Some properties of a soluble methane mono-oxygenase from *Methylococcus capsulatus* strain Bath. *Biochem J* **157**:495-497.
14. **Crombie, A. T., J. C. Murrell.** 2014. Trace-gas metabolic versatility of the facultative methanotroph *Methylocella silvestris*. *Nature* **510**:148–151.
15. **Dalton, H., R. Whittenbury.** 1976. The acetylene reduction technique as an assay for nitrogenase activity in the methane oxidizing bacterium *Methylococcus capsulatus* strain Bath. *Arch Microbiol* **109**:147-151.
16. **Darnajoux, R., J. Constantin, J. Miadlikowska, F. Lutzoni, J. P. Bellenger.** 2014. Is vanadium a biometal for boreal cyanolichens? *New Phytol* **202**:765-771.



17. **Dedysh, S.,P. Dunfield.** 2016. Beijerinckiaceae. Bergey's Manual of Systematics of Archaea and Bacteria.
18. **Dedysh, S. N.,P. F. Dunfield.** 2016. Beijerinckiaceae. Bergey's Manual of Systematics of Archaea and Bacteria 1-4.
19. **Dedysh, S. N., W. Liesack, V. N. Khmelenina, N. E. Suzina, Y. A. Trotsenko, J. D. Semrau, A. M. Bares, N. S. Panikov,J. M. Tiedje.** 2000. *Methylocella palustris* gen. nov., sp. nov., a new methane-oxidizing acidophilic bacterium from peat bogs, representing a novel subtype of serine-pathway methanotrophs. Int J Syst Evol Microbiol **50**:955-969.
20. **Dedysh, S. N., N. S. Panikov, W. Liesack, R. Großkopf, J. Zhou,J. M. Tiedje.** 1998. Isolation of acidophilic methane-oxidizing bacteria from northern peat wetlands. Science **282**:281-284.
21. **Dedysh, S. N., P. Ricke,W. Liesack.** 2004. NifH and NifD phylogenies: an evolutionary basis for understanding nitrogen fixation capabilities of methanotrophic bacteria. Microbiology **150**:1301-1313.
22. **Dilworth, M. J., R. R. Eady, R. L. Robson,R. W. Miller.** 1987. Ethane formation from acetylene as a potential test for vanadium nitrogenase *in vivo*. Nature **327**:167-168.
23. **Esson, K. C., X. Lin, D. Kumaresan, J. P. Chanton, J. C. Murrell,J. E. Kostka.** 2016. Alpha-and gammaproteobacterial methanotrophs codominate the active methane-oxidizing communities in an acidic boreal peat bog. Appl Environ Microbiol **82**:2363-2371.
24. **Fay, P.** 1992. Oxygen relations of nitrogen fixation in cyanobacteria. Microbio Mol Biol Rev **56**:340-373.
25. **Fulweiler, R. W., E. M. Heiss, M. K. Rogener, S. E. Newell, G. R. LeClerc, S. M. Kortebein,S. W. Wilhelm.** 2015. Examining the impact of acetylene on N-fixation and the active sediment microbial community. Front Microbiol **6**.
26. **Gaby, J. C.,D. H. Buckley.** 2014. A comprehensive aligned nifH gene database: a multipurpose tool for studies of nitrogen-fixing bacteria. Database **2014**:bau001.
27. **Gaby, J. C.,D. H. Buckley.** 2012. A comprehensive evaluation of PCR primers to amplify the *nifH* gene of nitrogenase. PLoS One **7**:e42149.
28. **García-Robledo, E., A. Corzo,S. Papaspyrou.** 2014. A fast and direct spectrophotometric method for the sequential determination of nitrate and nitrite at low concentrations in small volumes. Marine Chemistry **162**:30-36.
29. **Garrity, G., J. Bell,T. Lilburn.** 2015. Bradyrhizobiaceae fam. nov. Bergey's Manual of Systematics of Archaea and Bacteria:1-4.
30. **Glass, J. B., R. P. Axler, S. Chandra,C. R. Goldman.** 2012. Molybdenum limitation of microbial nitrogen assimilation in aquatic ecosystems and pure cultures. Front Microbiol **3**:331.
31. **Glass, J. B., F. L. Wolfe-Simon, J. J. Elser,A. D. Anbar.** 2010. Molybdenum-nitrogen co-limitation in freshwater and coastal heterocystous cyanobacteria. Limnol Oceanogr **55**:667-676.
32. **Gorham, E., C. Lehman, A. Dyke, D. Clymo,J. Janssens.** 2012. Long-term carbon sequestration in North American peatlands. Quat Sci Rev **58**:77-82.
33. **Granhall, U.,A. V. Hofsten.** 1976. Nitrogenase activity in relation to intracellular organisms in Sphagnum mosses. Physiol Plantarum **36**:88-94.
34. **Granhall, U.,H. Selander.** 1973. Nitrogen fixation in a subarctic mire. Oikos:8-15.

35. **Gupta, V., K. A. Smemo, J. B. Yavitt, N. Basiliko.** 2012. Active methanotrophs in two contrasting North American peatland ecosystems revealed using DNA-SIP. *Microbial Ecol* **63**:438-445.
36. **Hanson, P. J., J. S. Riggs, W. R. Nettles, J. R. Phillips, M. B. Krassovski, L. A. Hook, L. Gu, A. D. Richardson, D. M. Aubrecht, D. M. Ricciuto.** 2017. Attaining whole-ecosystem warming using air and deep-soil heating methods with an elevated CO<sub>2</sub> atmosphere. *Biogeosciences* **14**:861-883.
37. **Hardy, R., R. Burns, R. Holsten.** 1973. Applications of the acetylene-ethylene assay for measurement of nitrogen fixation. *Soil Biol Biochem* **5**:47-81.
38. **Hardy, R. W. F., R. D. Holsten, E. K. Jackson, R. C. Burns.** 1968. The acetylene-ethylene assay for N<sub>2</sub> fixation: laboratory and field evaluation. *Plant Physiol* **43**:1185-1207.
39. **Hill, B. H., T. M. Jicha, L. L. Lehto, C. M. Elonen, S. D. Sebestyen, R. K. Kolka.** 2016. Comparisons of soil nitrogen mass balances for an ombrotrophic bog and a minerotrophic fen in northern Minnesota. *Sci Total Environ* **550**:880-892.
40. **Ho, A., P. L. Bodelier.** 2015. Diazotrophic methanotrophs in peatlands: the missing link? *Plant Soil* **389**:419-423.
41. **Hodkinson, B., J. Allen, L. Forrest, B. Goffinet, E. Seurastiaux, O. Andreasson, V. Miao, J. P. Bellenger, F. Lutzoni.** 2014. Lichen-symbiotic cyanobacteria associated with *Peltigera* have an alternative vanadium-dependent nitrogen fixation system. *Eur J Phycol* **49**:11-19.
42. **Huson, D. H., S. Mitra, H.-J. Ruscheweyh, N. Weber, S. C. Schuster.** 2011. Integrative analysis of environmental sequences using MEGAN4. *Genome research* **21**:1552-1560.
43. **Hutchens, E., S. Radajewski, M. G. Dumont, I. R. McDonald, J. C. Murrell.** 2004. Analysis of methanotrophic bacteria in Movile Cave by stable isotope probing. *Environ Microbiol* **6**:111-120.
44. **Hynes, R., R. Knowles.** 1982. Effect of acetylene on autotrophic and heterotrophic nitrification. *Can J Microbiol* **28**:334-340.
45. **Keister, D.** 1975. Acetylene reduction by pure cultures of *Rhizobia*. *J Bacteriol* **123**:1265-1268.
46. **Keister, D. L., W. R. Evans.** 1976. Oxygen requirement for acetylene reduction by pure cultures of rhizobia. *J Bacteriol* **127**:149-153.
47. **Kip, N., B. E. Dutilh, Y. Pan, L. Bodrossy, K. Neveling, M. P. Kwint, M. S. Jetten, H. J. Op den Camp.** 2011. Ultra-deep pyrosequencing of *pmoA* amplicons confirms the prevalence of *Methylobacter* and *Methylocystis* in *Sphagnum* mosses from a Dutch peat bog. *Environ Microbiol Rep* **3**:667-673.
48. **Kip, N., W. Ouyang, J. van Winden, A. Raghoebarsing, L. van Niftrik, A. Pol, Y. Pan, L. Bodrossy, E. G. van Donselaar, G.-J. Reichart.** 2011. Detection, isolation, and characterization of acidophilic methanotrophs from *Sphagnum* mosses. *Appl Environ Microbiol* **77**:5643-5654.
49. **Kip, N., J. F. van Winden, Y. Pan, L. Bodrossy, G.-J. Reichart, A. J. Smolders, M. S. Jetten, J. S. S. Damsté, H. J. O. den Camp.** 2010. Global prevalence of methane oxidation by symbiotic bacteria in peat-moss ecosystems. *Nature Geosci* **3**:617-621.
50. **Knorr, K. H., M. A. Horn, W. Borken.** 2015. Significant nonsymbiotic nitrogen fixation in Patagonian ombrotrophic bogs. *Glob Change Biol* **21**:2357-2365.

- 541 51. **Kolb, S., C. Knief, S. Stubner, R. Conrad.** 2003. Quantitative detection of  
542 methanotrophs in soil by novel *pmoA*-targeted real-time PCR assays. Appl Environ  
543 Microbiol **69**:2423-2429.
- 544 52. **Kolka, R., S. Sebestyen, E. S. Verry, K. Brooks.** 2011. Peatland biogeochemistry and  
545 watershed hydrology at the Marcell experimental forest. CRC Press.
- 546 53. **Kostka, J. E., D. J. Weston, J. B. Glass, E. A. Lilleskov, A. J. Shaw, M. R. Turetsky.**  
547 2016. The *Sphagnum* microbiome: new insights from an ancient plant lineage. New  
548 Phytol **211**:57-64.
- 549 54. **Kox, M. A., C. Lüke, C. Fritz, E. van den Elzen, T. van Alen, H. J. O. den Camp, L.**  
550 **P. Lamers, M. S. Jetten, K. F. Ettwig.** 2016. Effects of nitrogen fertilization on  
551 diazotrophic activity of microorganisms associated with *Sphagnum magellanicum*. Plant  
552 Soil **406**:83-100.
- 553 55. **Larmola, T., S. M. Leppänen, E.-S. Tuittila, M. Aarva, P. Merilä, H. Fritze, M.**  
554 **Tirola.** 2014. Methanotrophy induces nitrogen fixation during peatland development.  
555 Proc Natl Acad Sci **111**:734-739.
- 556 56. **Leppänen, S. M., A. J. Rissanen, M. Tirola.** 2014. Nitrogen fixation in *Sphagnum*  
557 mosses is affected by moss species and water table level. Plant Soil:1-12.
- 558 57. **Leppänen, S. M., M. Salemaa, A. Smolander, R. Mäkipää, M. Tirola.** 2013. Nitrogen  
559 fixation and methanotrophy in forest mosses along a N deposition gradient. Environ Exp  
560 Bot **90**:62-69.
- 561 58. **Liebner, S., M. M. Svenning.** 2013. Environmental transcription of *mmoX* by methane-  
562 oxidizing Proteobacteria in a subarctic peatland. Appl Environ Microbiol **79**:701-  
563 706.
- 564 59. **Limpens, J., F. Berendse, C. Blodau, J. Canadell, C. Freeman, J. Holden, N. Roulet,**  
565 **H. Rydin, G. Schaepman-Strub.** 2008. Peatlands and the carbon cycle: from local  
566 processes to global implications: a synthesis. Biogeosciences **5**:1475-1491.
- 567 60. **Limpens, J., M. M. Heijmans, F. Berendse.** 2006. The nitrogen cycle in boreal  
568 peatlands, p. 195-230, Boreal peatland ecosystems. Springer.
- 569 61. **Lin, X., S. Green, M. Tfaily, O. Prakash, K. Konstantinidis, J. Corbett, J. Chanton,**  
570 **W. Cooper, J. Kostka.** 2012. Microbial community structure and activity linked to  
571 contrasting biogeochemical gradients in bog and fen environments of the Glacial Lake  
572 Agassiz Peatland. Appl Environ Microbiol **78**:7023-7031.
- 573 62. **Lin, X., K. M. Handley, J. A. Gilbert, J. E. Kostka.** 2015. Metabolic potential of fatty  
574 acid oxidation and anaerobic respiration by abundant members of Thaumarchaeota and  
575 Thermoplasmata in deep anoxic peat. ISME J **9**:2740-2744.
- 576 63. **Lin, X., M. M. Tfaily, S. Green, J. M. Steinweg, P. Chanton, A. Invittaya, J. P.**  
577 **Chanton, W. Cooper, C. W. Schadt, J. E. Kostka.** 2014. Microbial metabolic potential  
578 for carbon degradation and nutrient (nitrogen and phosphorus) acquisition in an  
579 ombrotrophic peatland. Appl Environ Microbiol **80**:3531-3540.
- 580 64. **Lin, X., M. M. Tfaily, J. M. Steinweg, P. Chanton, K. Esson, Z. K. Yang, J. P.**  
581 **Chanton, W. Cooper, C. W. Schadt, J. E. Kostka.** 2014. Microbial community  
582 stratification linked to utilization of carbohydrates and phosphorus limitation in a boreal  
583 peatland at Marcell Experimental Forest, Minnesota, USA. Appl Environ Microbiol  
584 **80**:3518-3530.

65. **Loveless, T. M., J. R. Saah, P. E. Bishop.** 1999. Isolation of nitrogen-fixing bacteria containing molybdenum-independent nitrogenases from natural environments. *Appl Environ Microbiol* **65**:4223-4226.
66. **McGlynn, S. E., E. S. Boyd, J. W. Peters, V. J. Orphan.** 2013. Classifying the metal dependence of uncharacterized nitrogenases. *Front Microbiol* **3**:419.
67. **Miller, R., R. Eady.** 1988. Molybdenum and vanadium nitrogenases of *Azotobacter chroococcum*. Low temperature favours N<sub>2</sub> reduction by vanadium nitrogenase. *Biochem J* **256**:429-432.
68. **Murphy, J., J. Riley.** 1962. A modified single solution method for the determination of phosphate in natural waters. *Anal Chim Acta* **27**:31-36.
69. **Opelt, K., C. Berg, S. Schonmann, L. Eberl, G. Berg.** 2007. High specificity but contrasting biodiversity of *Sphagnum*-associated bacterial and plant communities in bog ecosystems independent of the geographical region. *The ISME Journal* **1**:502-516.
70. **Opelt, K., V. Chobot, F. Hadacek, S. Schonmann, L. Eberl, G. Berg.** 2007. Investigations of the structure and function of bacterial communities associated with *Sphagnum* mosses. *Environ Microbiol* **9**:2795-2809.
71. **Oremland, R. S., B. F. Taylor.** 1975. Inhibition of methanogenesis in marine sediments by acetylene and ethylene: validity of the acetylene reduction assay for anaerobic microcosms. *Appl Microbiol* **30**:707-709.
72. **Payne, W., M. Grant.** 1982. Influence of acetylene on growth of sulfate-respiring bacteria. *Appl Environ Microbiol* **43**:727-730.
73. **Prior, S. D., H. Dalton.** 1985. Acetylene as a suicide substrate and active site probe for methane monooxygenase from *Methylococcus capsulatus* (Bath). *FEMS Microbiol Lett* **29**:105-109.
74. **Raghoebarsing, A. A., A. J. Smolders, M. C. Schmid, W. I. C. Rijpstra, M. Wolters-Arts, J. Derksen, M. S. Jetten, S. Schouten, J. S. S. Damsté, L. P. Lamers, J. G. M. Roelofs, H. J. M. Op den Camp, M. Strous.** 2005. Methanotrophic symbionts provide carbon for photosynthesis in peat bogs. *Nature* **436**:1153-1156.
75. **Rahman, M. T., A. Crombie, Y. Chen, N. Stralis-Pavese, L. Bodrossy, P. Meir, N. P. McNamara, J. C. Murrell.** 2011. Environmental distribution and abundance of the facultative methanotroph *Methylocella*. *The ISME journal* **5**:1061-1066.
76. **Raymond, J., J. L. Siefert, C. R. Staples, R. E. Blankenship.** 2004. The natural history of nitrogen fixation. *Mol Biol Evol* **21**:541-554.
77. **Rosswall, T., U. Granhall.** 1980. Nitrogen cycling in a subarctic ombrotrophic mire. *Ecological Bulletins*:209-234.
78. **Schwintzer, C. R.** 1983. Nonsymbiotic and symbiotic nitrogen fixation in a weakly minerotrophic peatland. *Am J Bot* **70**:1071-1078.
79. **Sebestyen, S. D., C. Dorrance, D. M. Olson, E. S. Verry, R. K. Kolka, A. E. Elling, R. Kyllander.** 2011. Long-term monitoring sites and trends at the Marcell Experimental Forest. *Peatland Biogeochemistry and Watershed Hydrology at the Marcell Experimental Forest*:93-134.
80. **Semrau, J. D., A. A. DiSpirito, S. Yoon.** 2010. Methanotrophs and copper. *FEMS Microbiol Rev* **34**:496-531.
81. **Spiff, E., C. Odu.** 1973. Acetylene reduction by *Beijerinckia* under various partial pressures of oxygen and acetylene. *Microbiology* **78**:207-209.



82. **Sprott, G., K. Jarrell, K. Shaw, R. Knowles.** 1982. Acetylene as an inhibitor of methanogenic bacteria. *J Gen Microbiol* **128**:2453-2462.
83. **Steinberg, L. M., J. M. Regan.** 2008. Phylogenetic comparison of the methanogenic communities from an acidic, oligotrophic fen and an anaerobic digester treating municipal wastewater sludge. *Appl Environ Microbiol* **74**:6663-6671.
84. **Stirling, D. I., H. Dalton.** 1977. Effect of metal-binding agents and other compounds on methane oxidation by two strains of *Methylococcus capsulatus*. *Arch Microbiol* **114**:71-76.
85. **Strickland, J., T. Parsons.** 1972. A practical handbook of seawater analysis, vol. 167.
86. **Tamura, K., D. Peterson, N. Peterson, G. Stecher, M. Nei, S. Kumar.** 2011. MEGA5: molecular evolutionary genetics analysis using maximum likelihood, evolutionary distance, and maximum parsimony methods. *Mol Biol Evol* **28**:2731-2739.
87. **Urban, N., S. Eisenreich.** 1988. Nitrogen cycling in a forested Minnesota bog. *Can J Bot* **66**:435-449.
88. **Vaughan, D., D. Lumsdon, D. Linehan.** 1993. Influence of dissolved organic matter on the bio-availability and toxicity of metals in soils and aquatic systems. *Chem Ecol* **8**:185-201.
89. **Vile, M. A., R. K. Wieder, T. Živković, K. D. Scott, D. H. Vitt, J. A. Hartsock, C. L. Iosue, J. C. Quinn, M. Petix, H. M. Fillingim.** 2014. N<sub>2</sub>-fixation by methanotrophs sustains carbon and nitrogen accumulation in pristine peatlands. *Biogeochemistry* **121**:317-328.
90. **Walmsley, J., C. Kennedy.** 1991. Temperature-dependent regulation by molybdenum and vanadium of expression of the structural genes encoding 3 nitrogenases in *Azotobacter vinelandii*. *Appl Environ Microbiol* **57**:622-624.
91. **Wedepohl, K. H.** 1995. The composition of the continental crust. *Geochem Cosmochim Acta* **59**:1217-1232.
92. **Weston, D. J., C. M. Timm, A. P. Walker, L. Gu, W. Muchero, J. Schmutz, A. J. Shaw, G. A. Tuskan, J. M. Warren, S. D. Wullschleger.** 2015. *Sphagnum* physiology in the context of changing climate: Emergent influences of genomics, modeling and host-microbiome interactions on understanding ecosystem function. *Plant Cell Environ* **38**:1737-1751.
93. **Wong, P. P., R. Burris.** 1972. Nature of oxygen inhibition of nitrogenase from *Azotobacter vinelandii*. *Proc Natl Acad Sci* **69**:672-675.
94. **Yu, Z.** 2012. Northern peatland carbon stocks and dynamics: a review. *Biogeosciences* **4071–4085**:4071–4085.
95. **Zhao, Y., H. Tang, Y. Ye.** 2012. RAPSearch2: a fast and memory-efficient protein similarity search tool for next-generation sequencing data. *Bioinformatics* **28**:125-126.
96. **Zheng, H., C. Dietrich, R. Radek, A. Brune.** 2016. *Endomicrobium proavitum*, the first isolate of Endomicrobia class. nov. (phylum Elusimicrobia)—an ultramicrobacterium with an unusual cell cycle that fixes nitrogen with a Group IV nitrogenase. *Environ Microbiol* **18**:191-204.



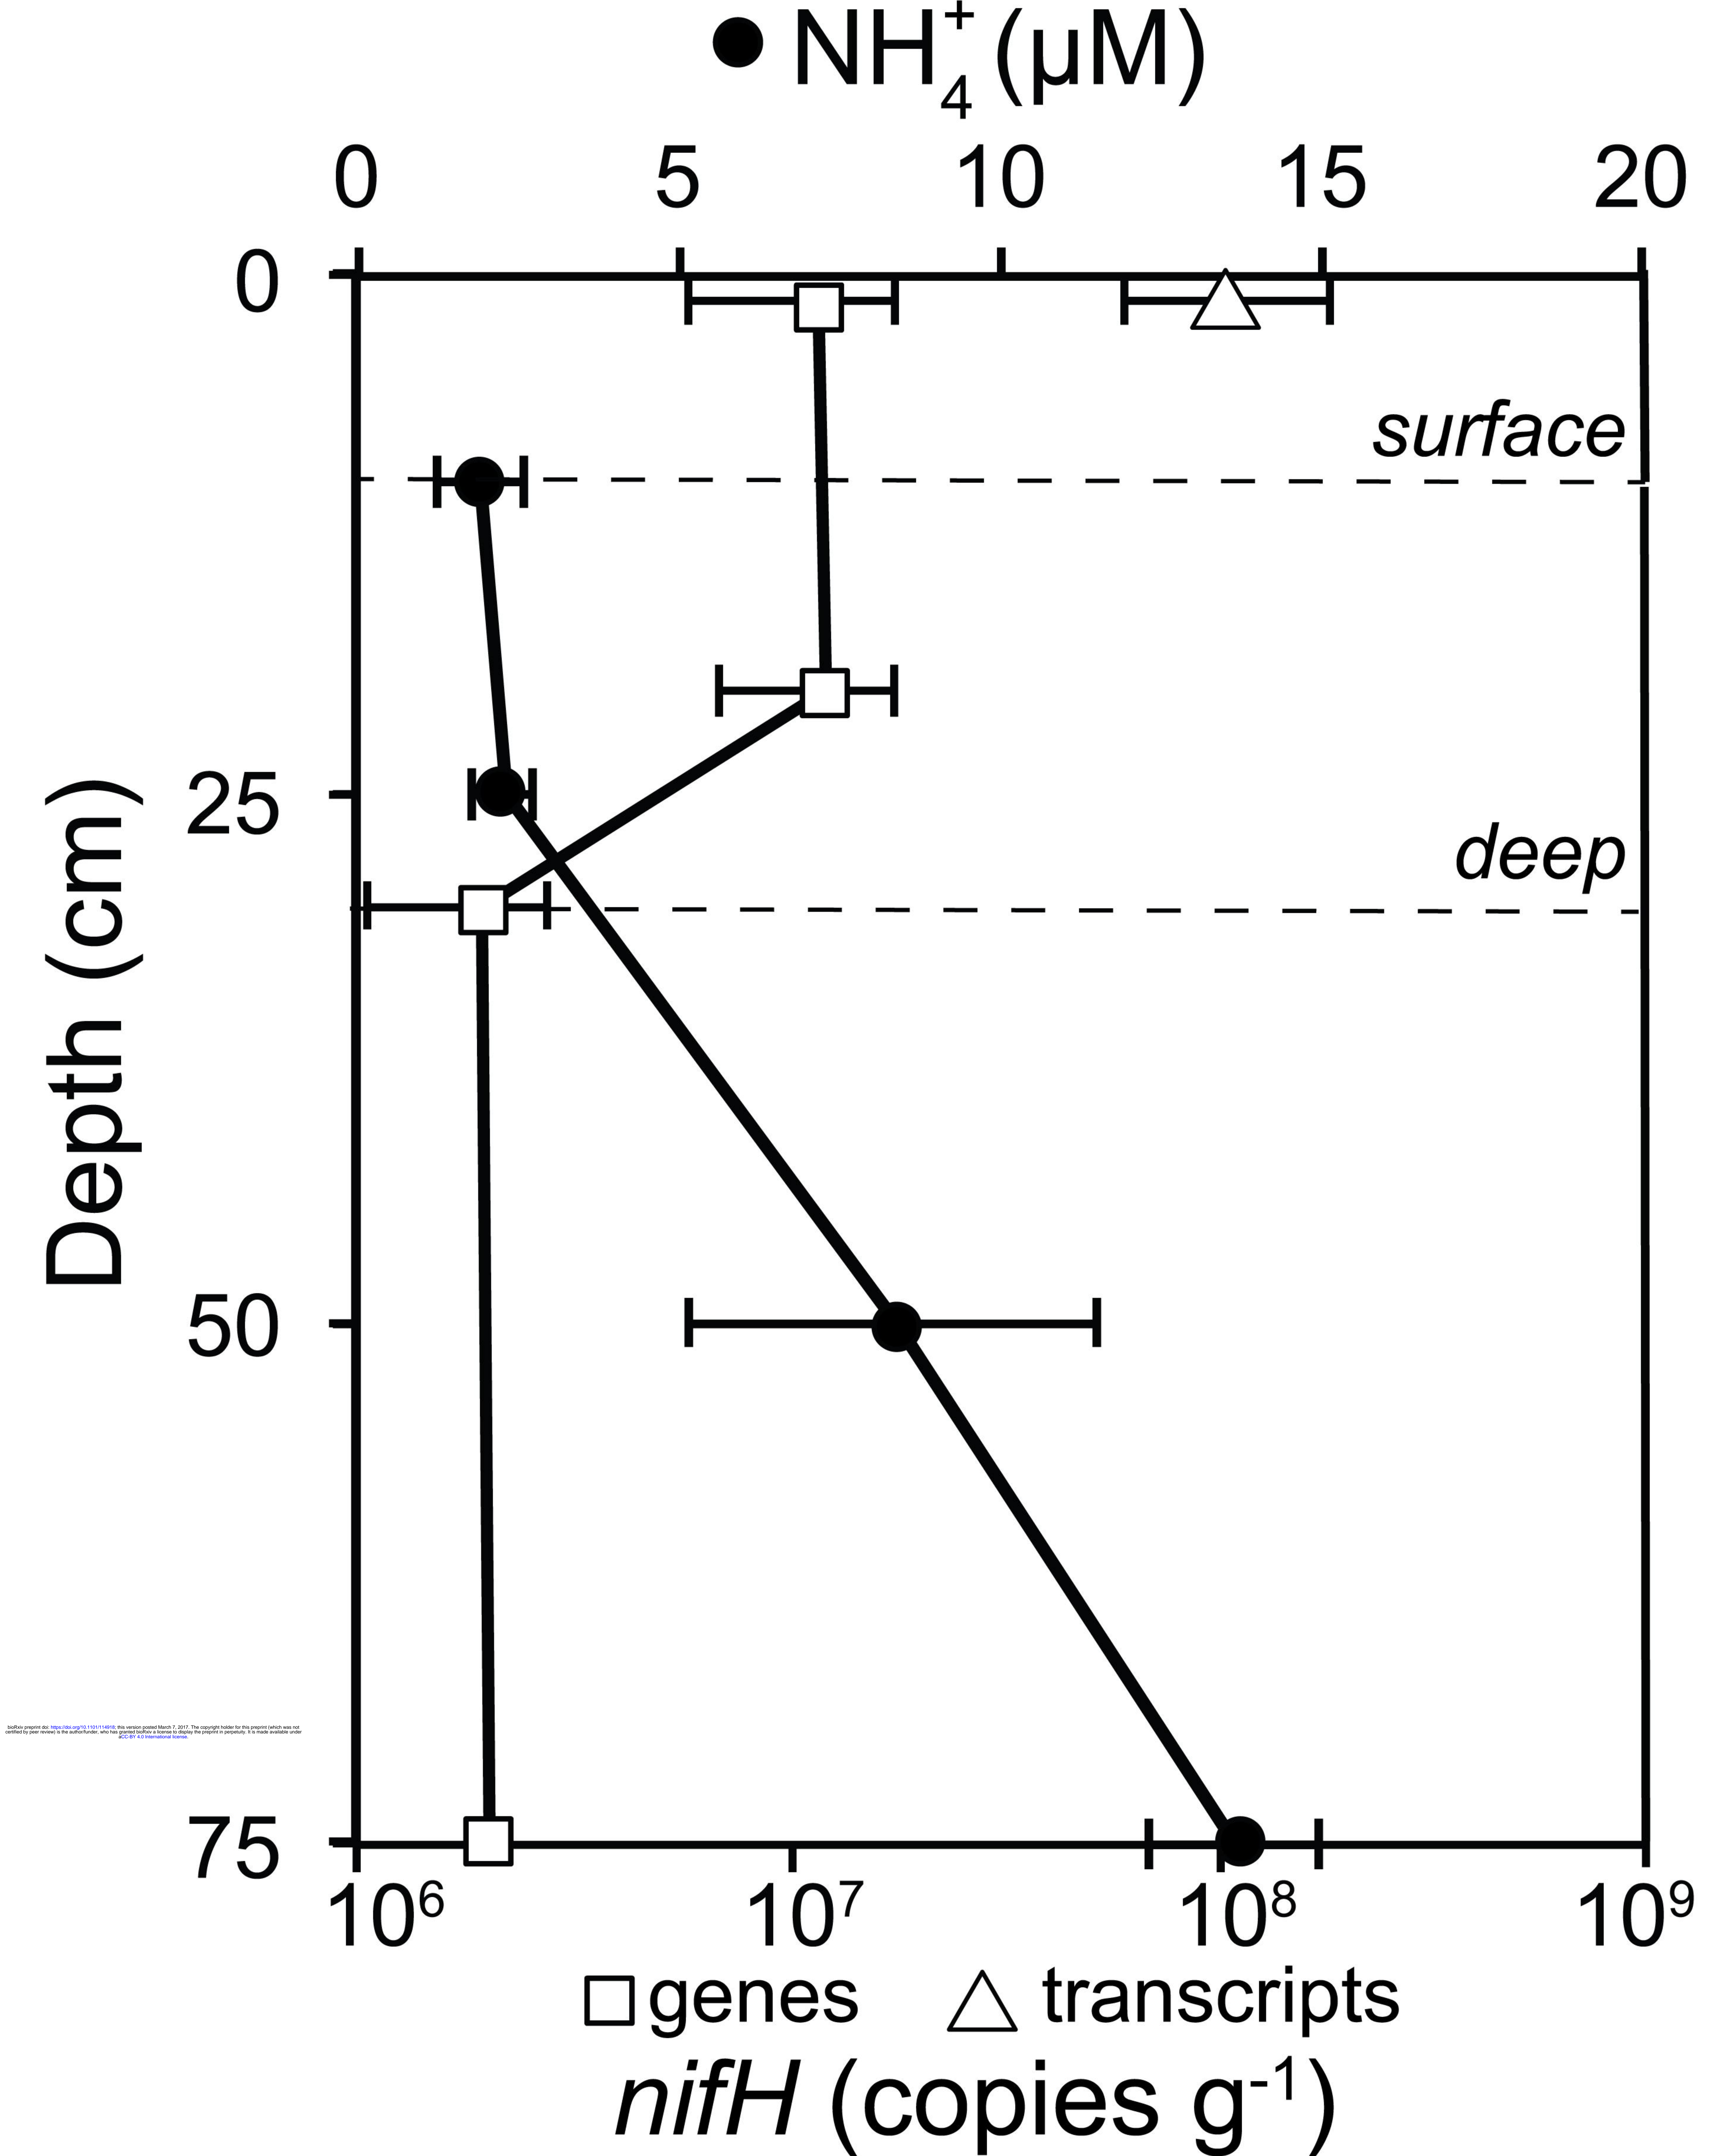



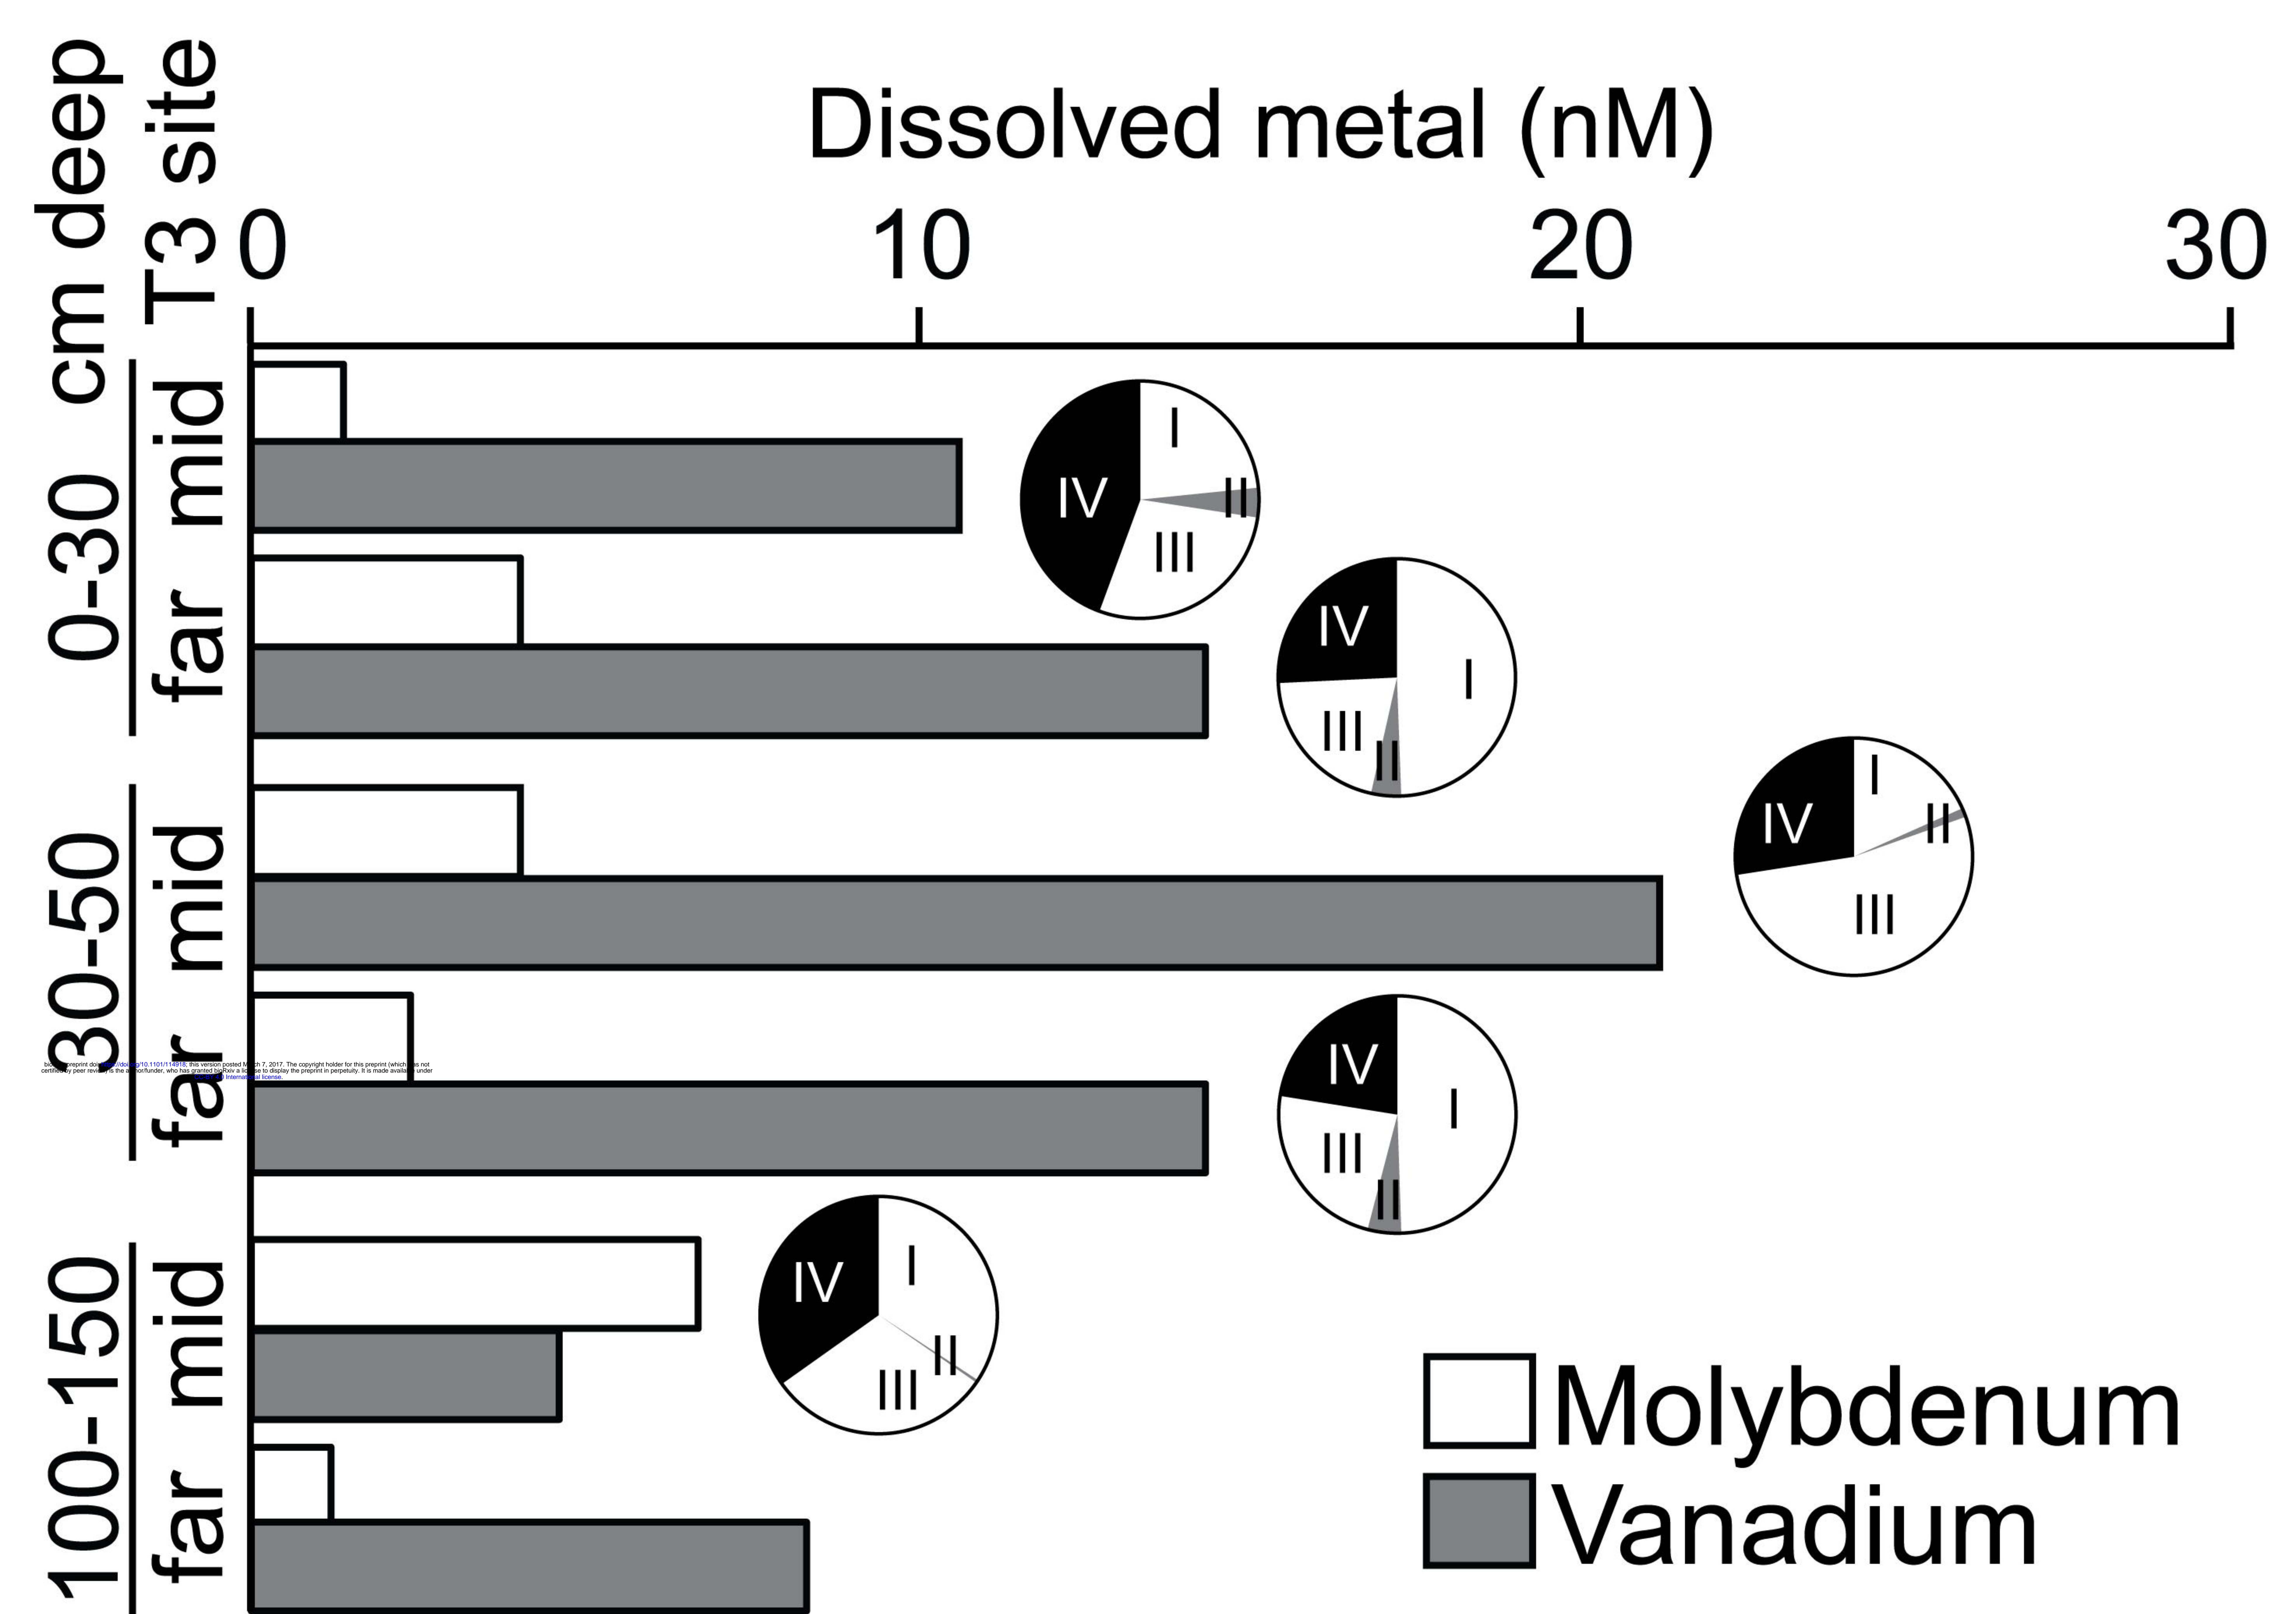



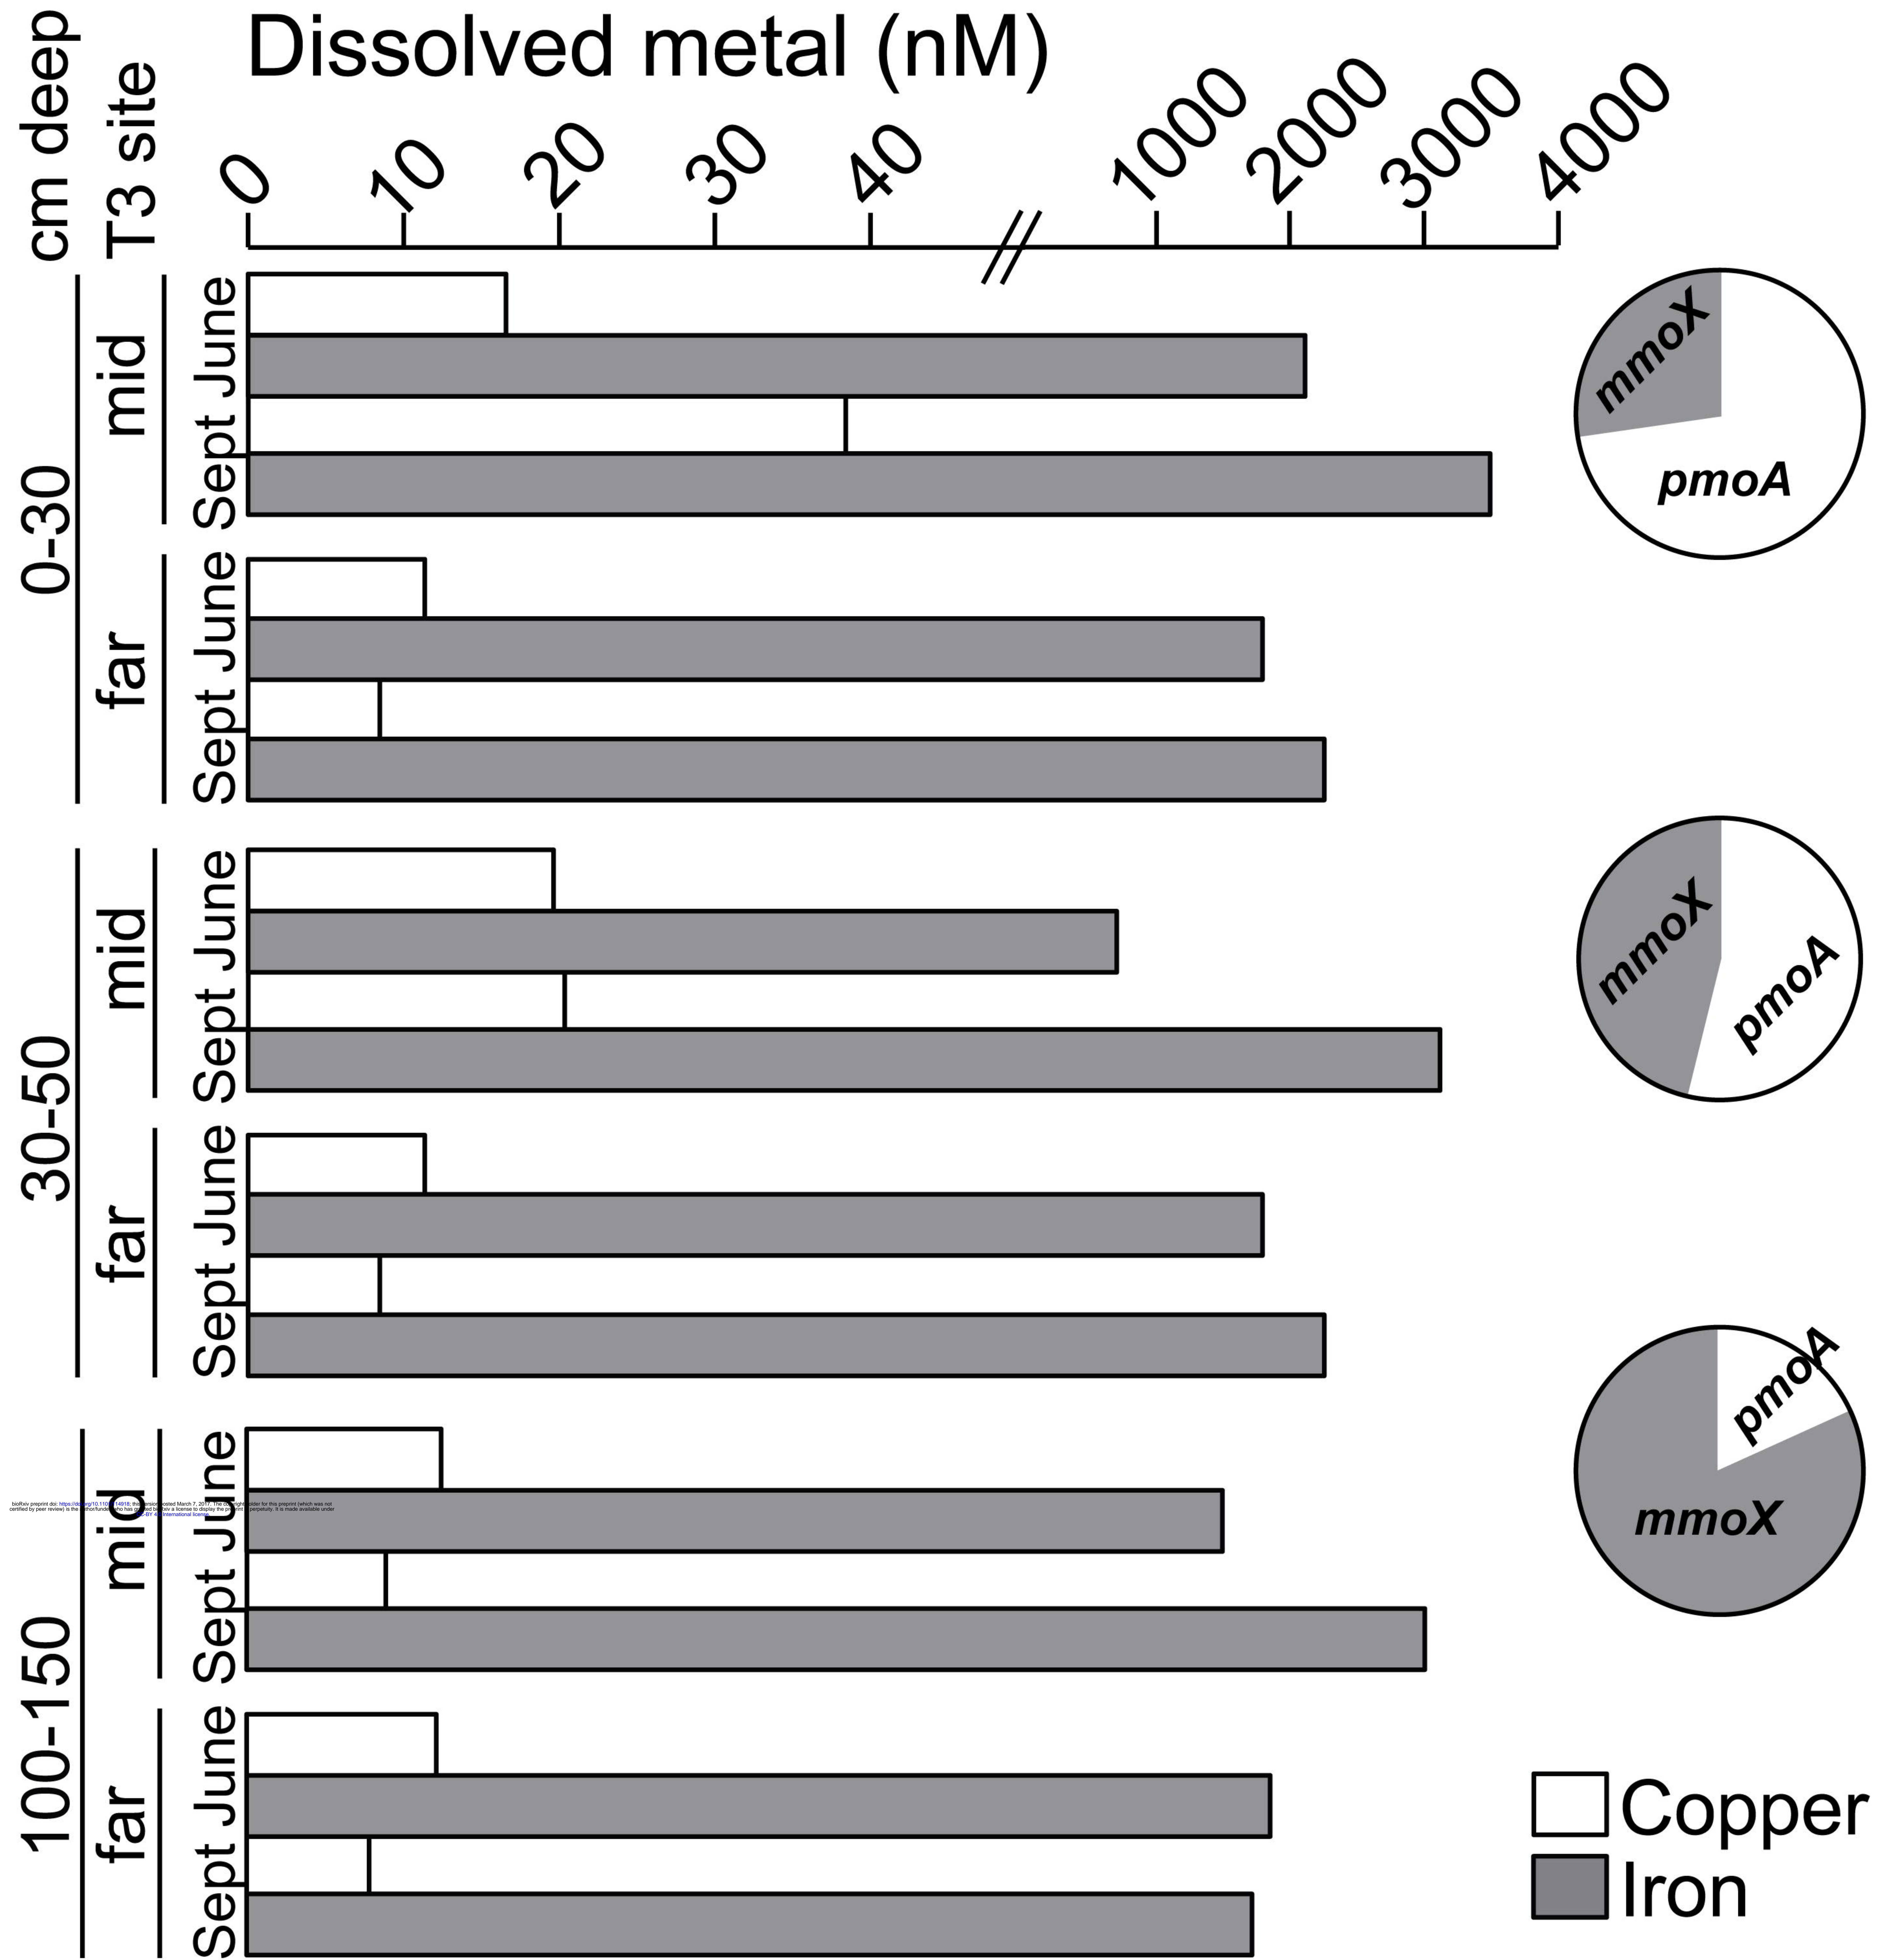



Acetylene reduction rate  
( $\mu\text{mol g}^{-1} \text{ h}^{-1}$ )

- $\text{CO}_2$
- $\text{CO}_2/\text{CH}_4$
- $\text{CH}_4$
- $\text{O}_2$
- $\text{O}_2/\text{CH}_4$

*Sphagnum fallax*  
*Sphagnum angustifolium*

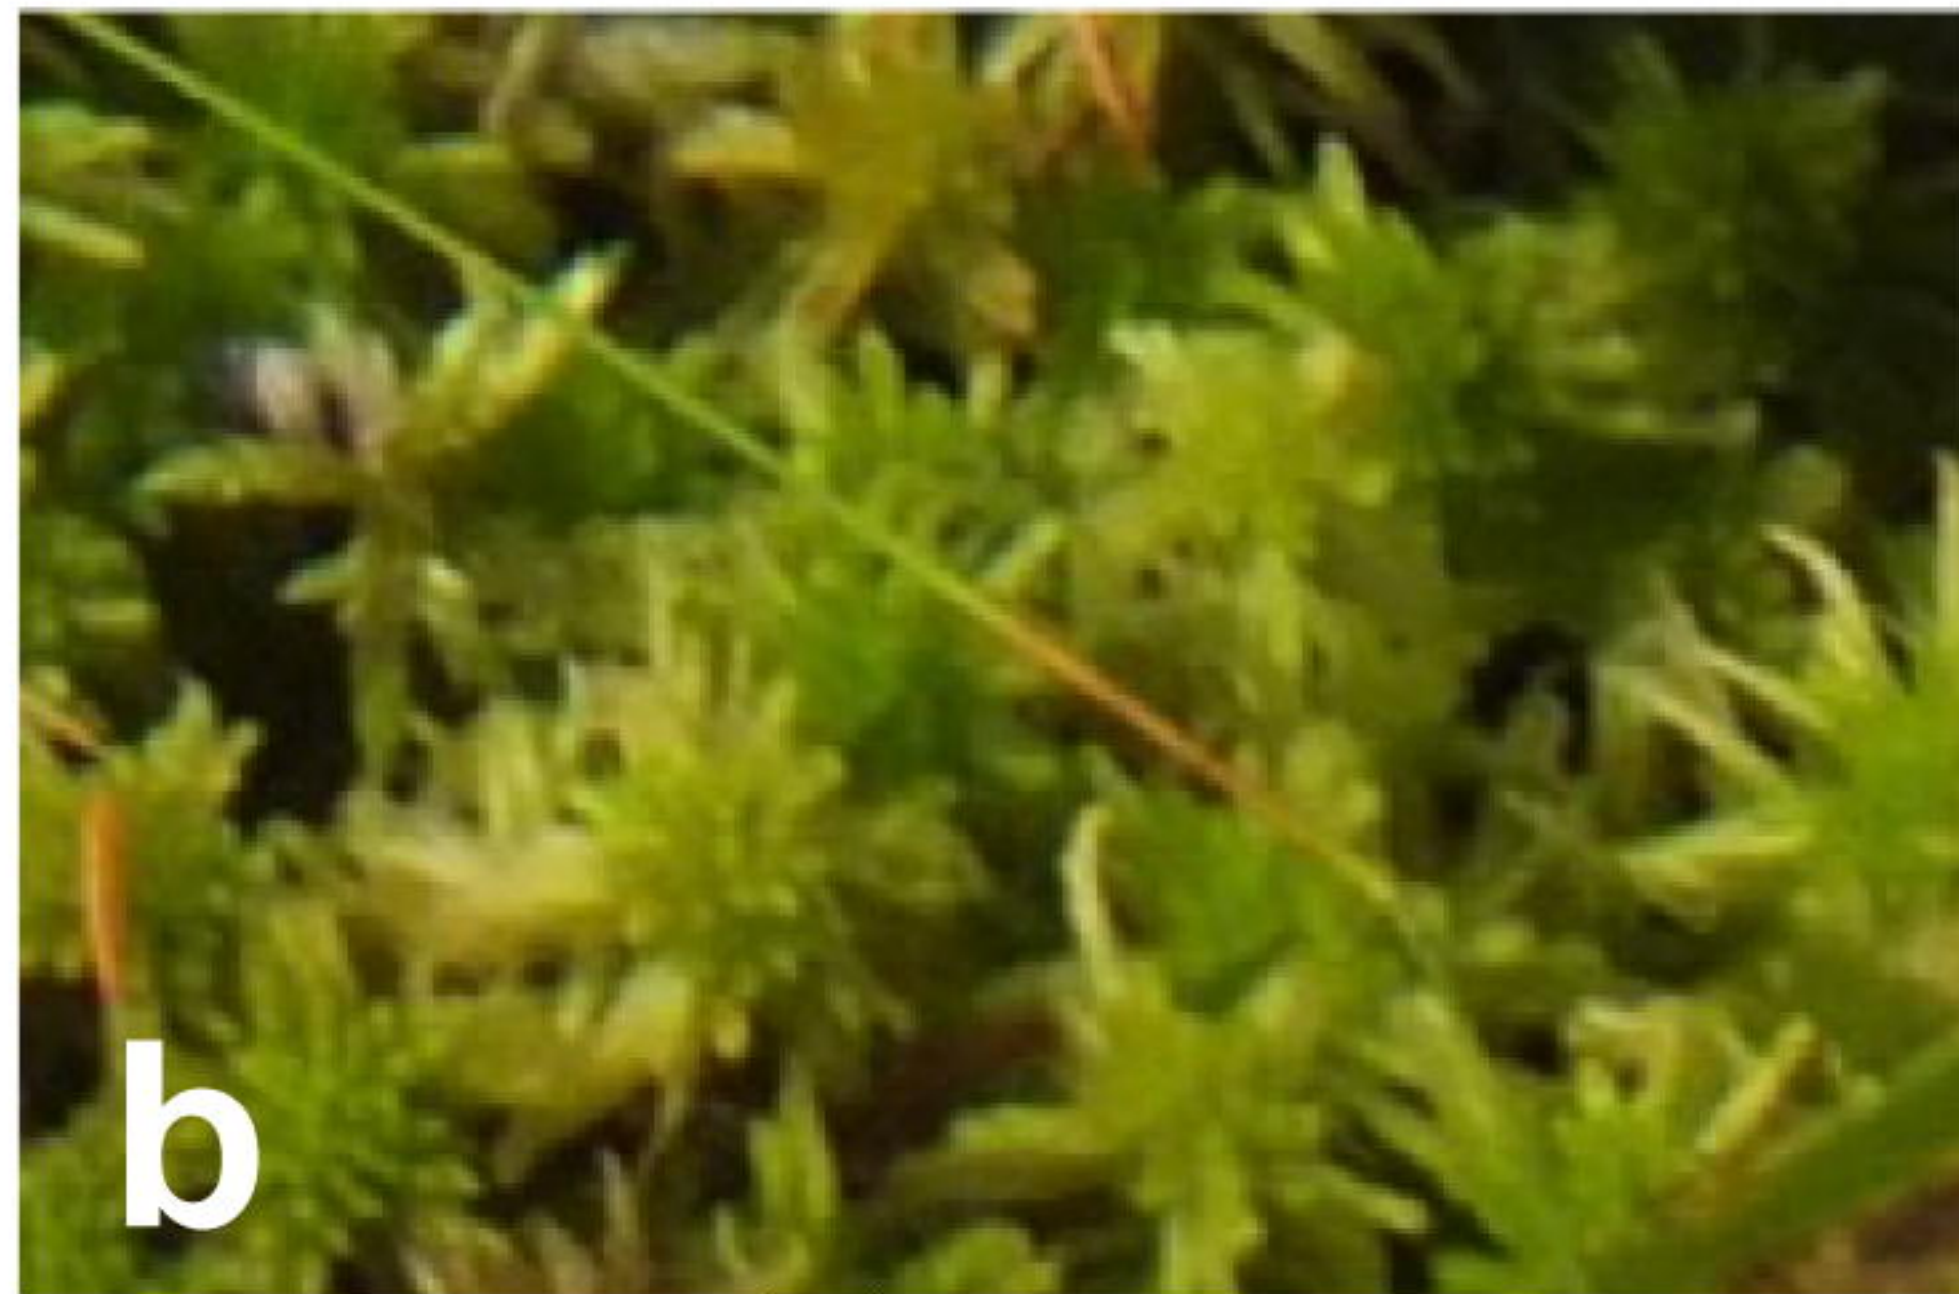

Hollows

*Sphagnum magellanicum*

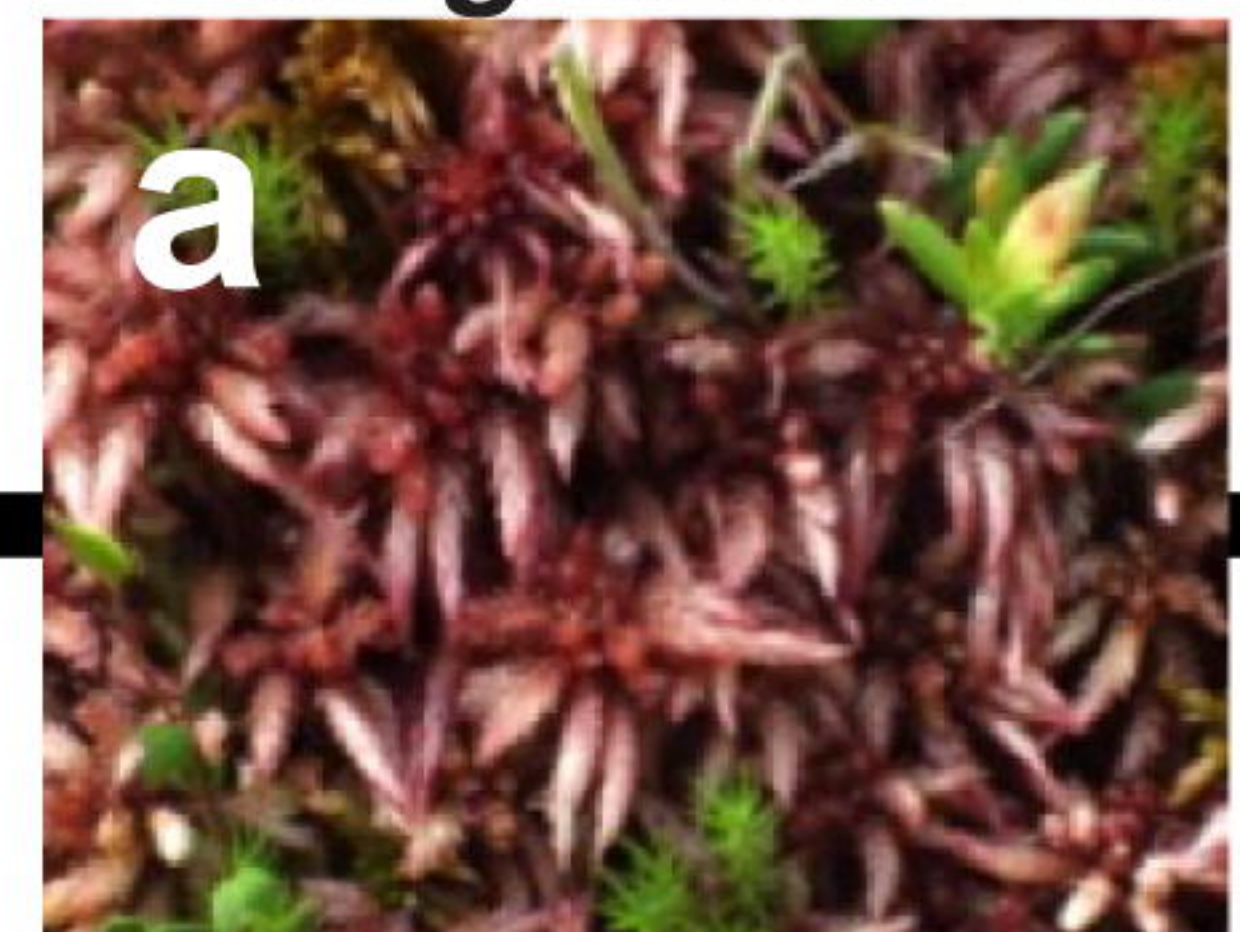

Hummocks

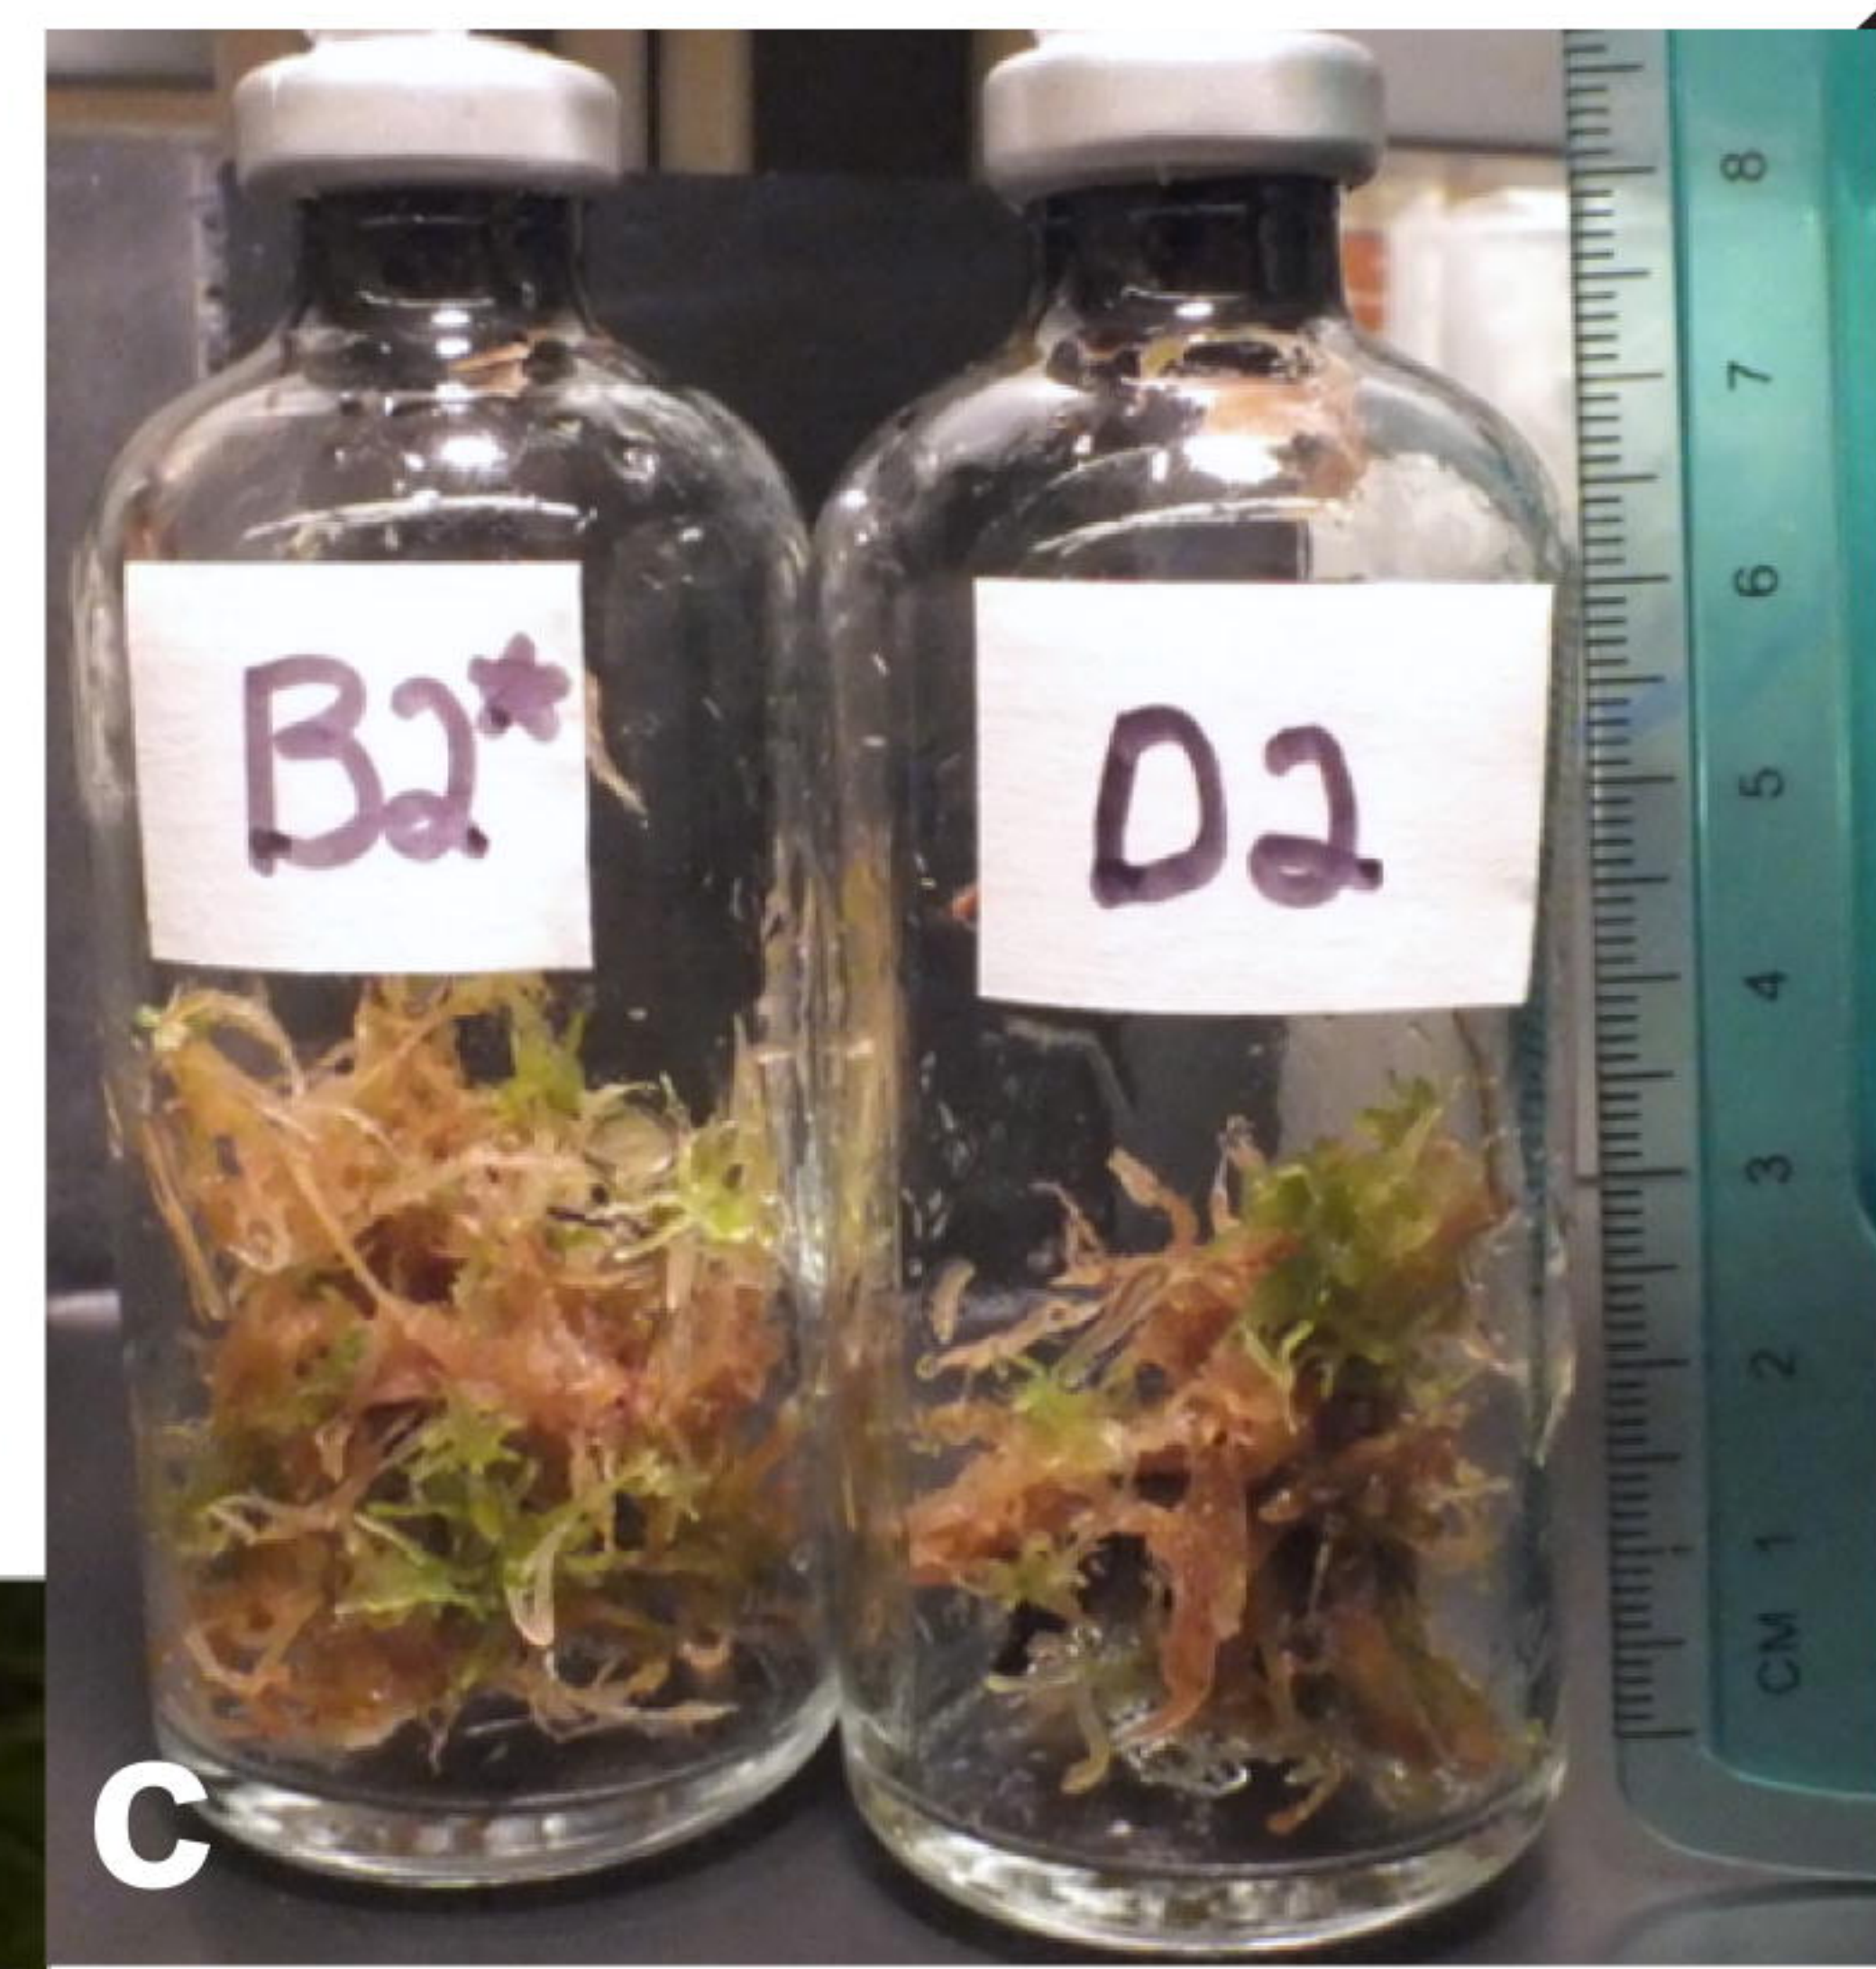

c

bioRxiv preprint doi: <https://doi.org/10.1101/114918>; this version posted March 7, 2017. The copyright holder for this preprint (which was not certified by peer review) is the author/funder, who has granted bioRxiv a license to display the preprint in perpetuity. It is made available under aCC-BY 4.0 International license.

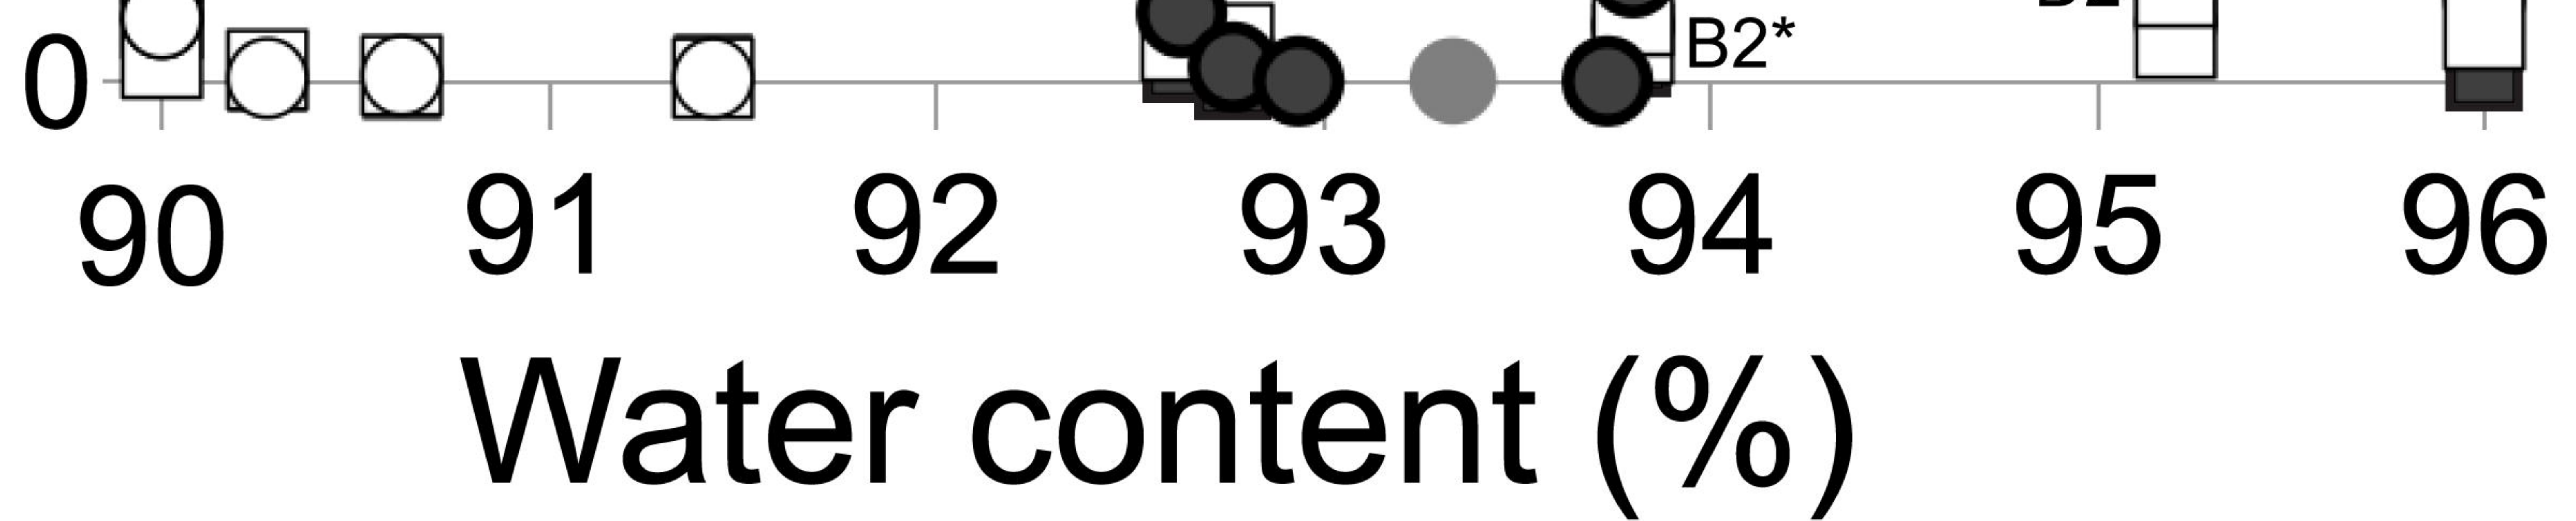



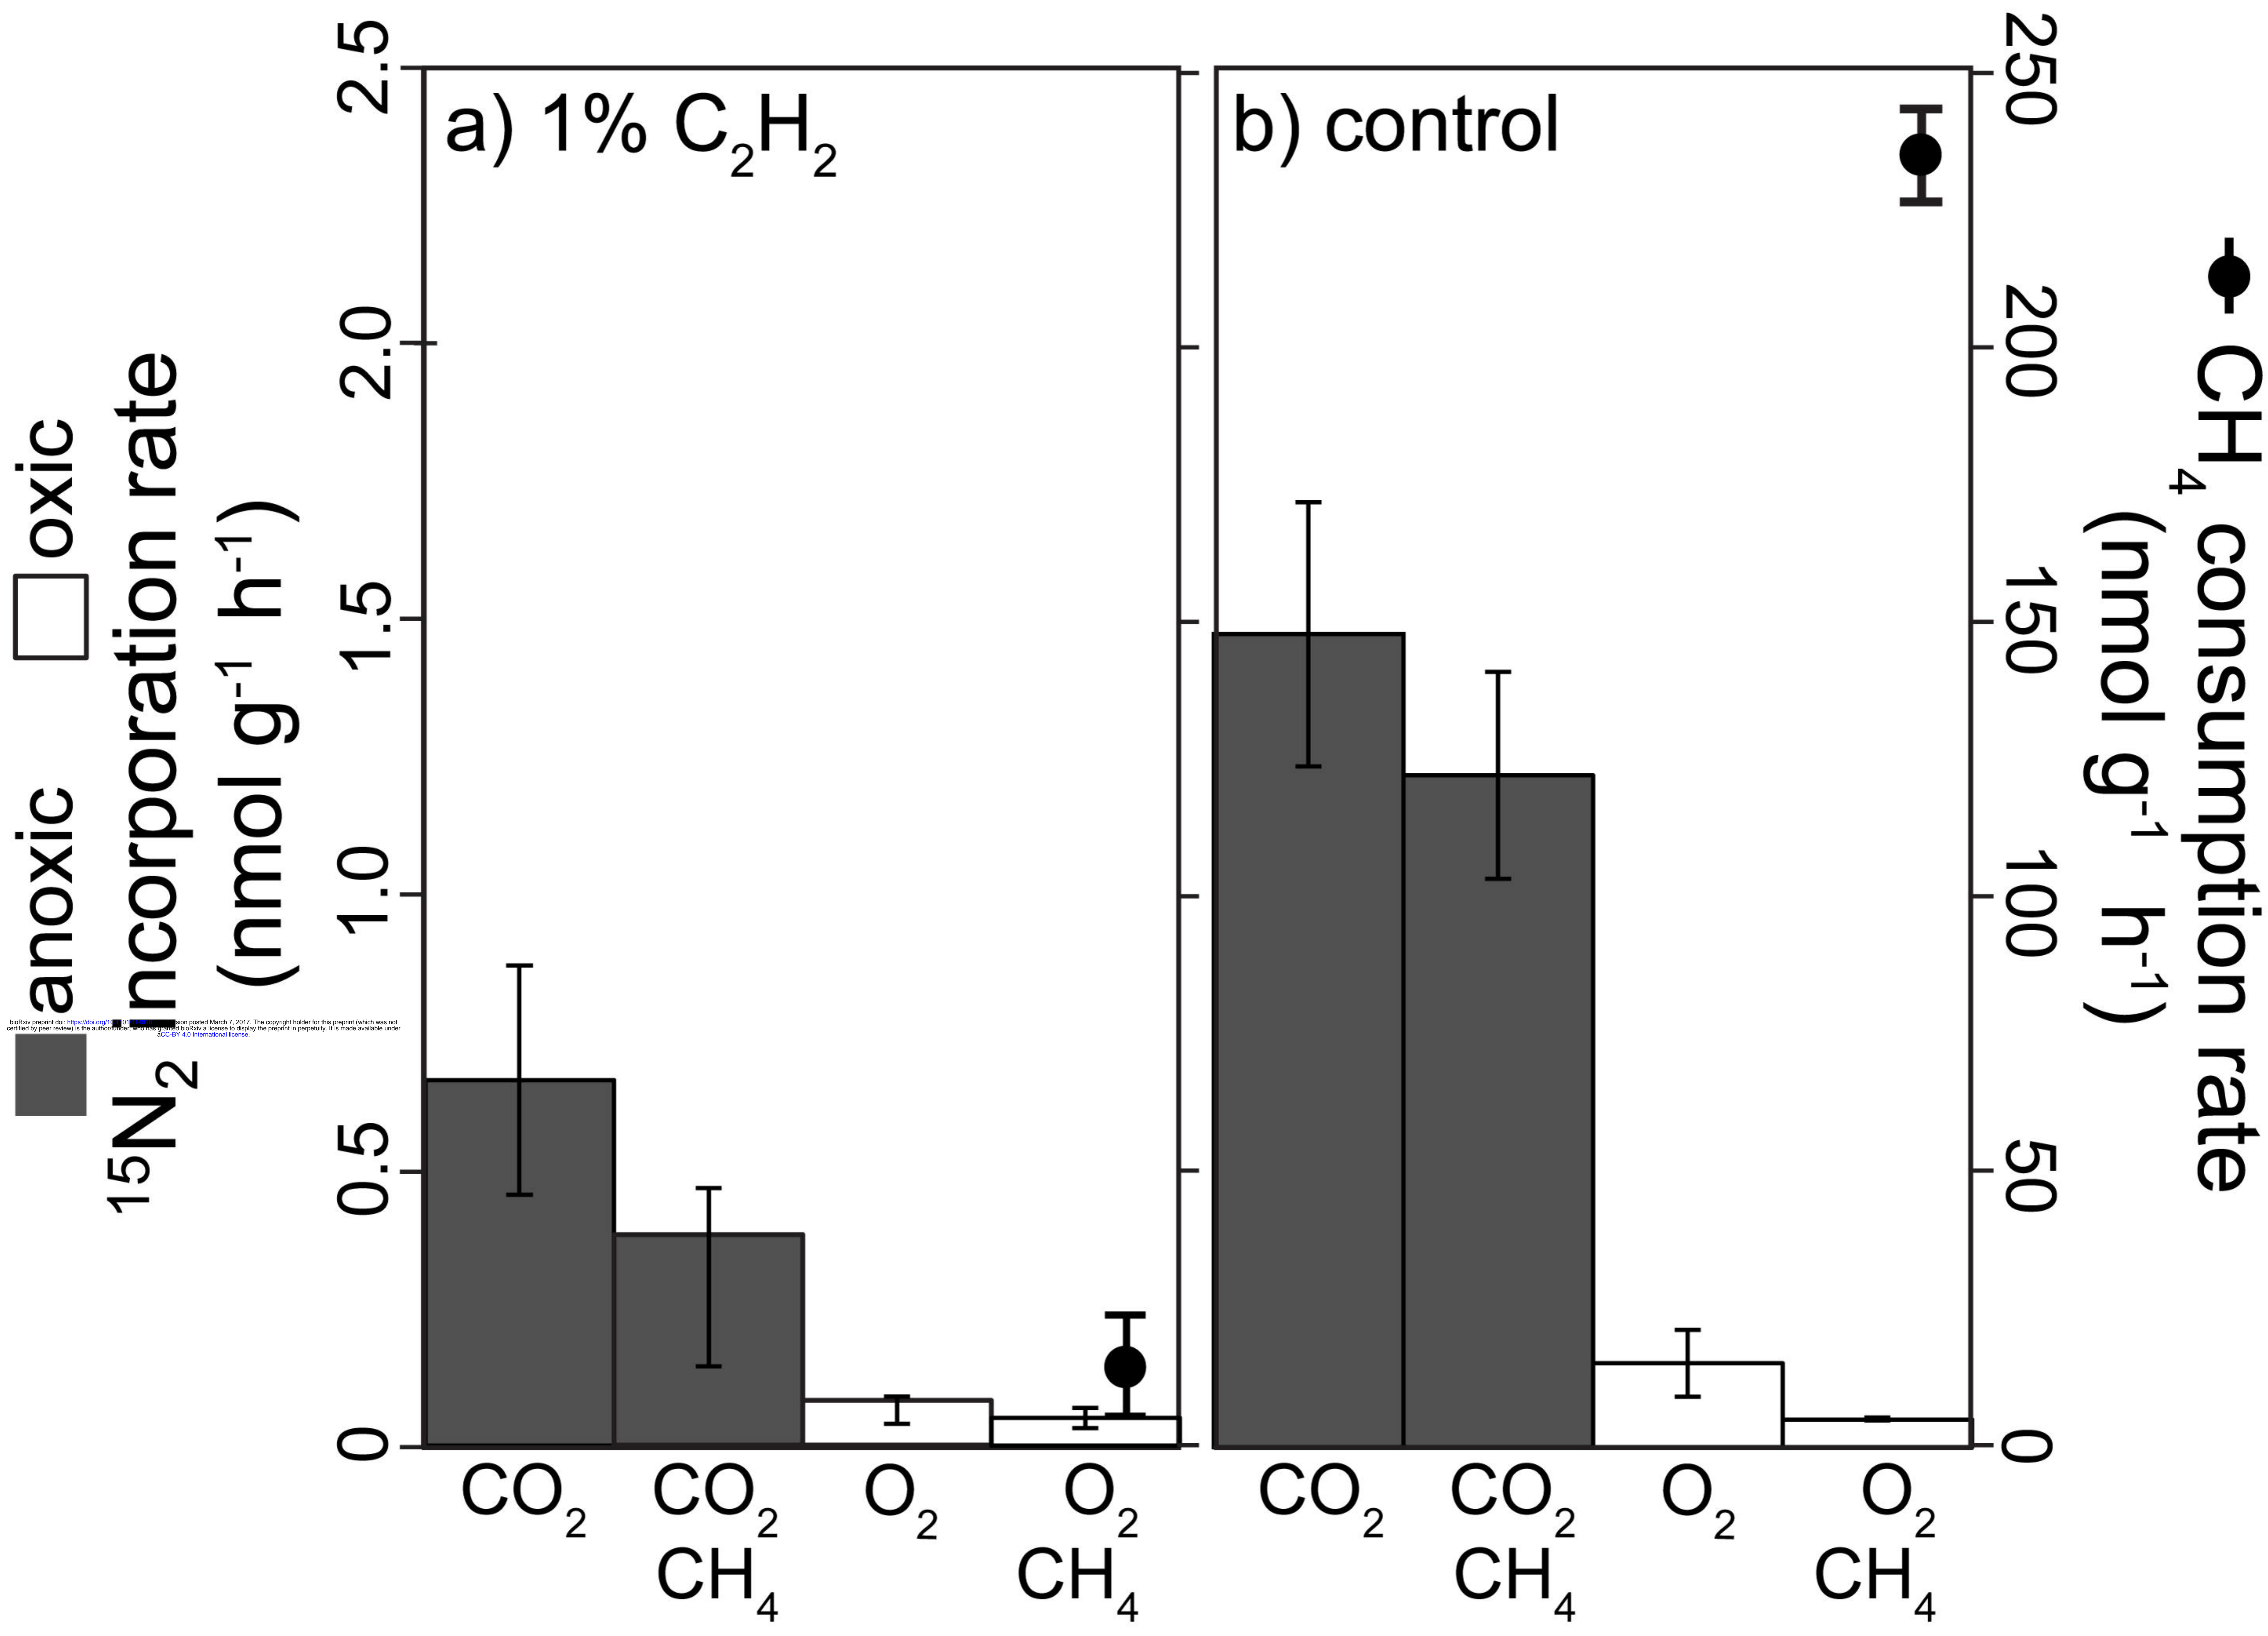

Source: http://biorxiv.org/content/10.1101/114918v1.full.pdf
